# Supplementary material
Source: PubMed Central journal article supplement (PMC4719442)
Supplement: JB.00795-15_zjb999093908so1.pdf [file JB.00795-15_zjb999093908so1.pdf]

## SUPPLEMENT

### ***Cyclic di-GMP* regulates multiple cellular functions in the symbiotic $\alpha$ -proteobacterium *Sinorhizobium meliloti***

Simon Schäper<sup>a</sup>, Elizaveta Krol<sup>a</sup>, Dorota Skotnicka<sup>b</sup>, Volkhard Kaever<sup>c</sup>, Rolf Hilker<sup>d</sup>, Lotte Søgaard-Andersen<sup>b</sup>, Anke Becker<sup>a</sup>

*LOEWE Center for Synthetic Microbiology (SYNMIKRO), Philipps-Universität Marburg, Marburg, Germany<sup>a</sup>; Department of Ecophysiology, Max Planck Institute for Terrestrial Microbiology, Marburg, Germany<sup>b</sup>; Research Core Unit Metabolomics, Hannover Medical School, Hannover, Germany<sup>c</sup>; Institute of Medical Microbiology, Justus-Liebig University, Giessen, Germany<sup>d</sup>*

## Media and antibiotic concentrations

TY medium (5 g/L tryptone, 3 g/L yeast extract, 0.4 g  $\text{CaCl}_2 \cdot 2\text{H}_2\text{O}$ ). LB medium (10 g/L tryptone, 5 g/L yeast extract, 5 g/L NaCl). YM medium (0.5 g/L  $\text{K}_2\text{HPO}_4$ , 0.5 g/L  $\text{KH}_2\text{PO}_4$ , 0.2 g/L  $\text{MgSO}_4 \cdot 7\text{H}_2\text{O}$ , 0.1 g/L NaCl, 1 g/L yeast extract, 10 g/L mannitol, pH 7.2). MOPS-buffered minimal medium (MM) (10 g/L MOPS, 10 g/L mannitol, 3.55 g/L sodium glutamate, 0.246 g/L  $\text{MgSO}_4 \cdot 7\text{H}_2\text{O}$ , 0.25 mM  $\text{CaCl}_2$ , 2 mM  $\text{K}_2\text{HPO}_4$ , 10 mg/L  $\text{FeCl}_3 \cdot 6\text{H}_2\text{O}$ , 1 mg/L biotin, 3 mg/L  $\text{H}_3\text{BO}_3$ , 2.23 mg/L  $\text{MnSO}_4 \cdot \text{H}_2\text{O}$ , 0.287 mg/L  $\text{ZnSO}_4 \cdot 7\text{H}_2\text{O}$ , 0.125 mg/L  $\text{CuSO}_4 \cdot 5\text{H}_2\text{O}$ , 0.065 mg/L  $\text{CoCl}_2 \cdot 6\text{H}_2\text{O}$ , 0.12 mg/L  $\text{NaMoO}_4 \cdot 2\text{H}_2\text{O}$ , pH 7.2). MGM medium (11 g/L  $\text{Na}_2\text{HPO}_4 \cdot 2\text{H}_2\text{O}$ , 3 g/L  $\text{KH}_2\text{PO}_4$ , 0.5 g/L NaCl, 1 g/L sodium glutamate, 10 g/L mannitol, 0.2 mM  $\text{CaCl}_2$ , 1 mM  $\text{MgSO}_4$ , 1 mg/L biotin).

Plant medium (147 mg/L  $\text{CaCl}_2 \cdot 2\text{H}_2\text{O}$ , 68 mg/L  $\text{KH}_2\text{PO}_4$ , 3.35 mg/L Fe citrate, 61.7 mg/L  $\text{MgSO}_4 \cdot 7\text{H}_2\text{O}$ , 43.5 mg/L  $\text{K}_2\text{SO}_4$ , 0.169 mg/L  $\text{MnSO}_4 \cdot \text{H}_2\text{O}$ , 123.5 mg/L  $\text{H}_3\text{BO}_4$ , 0.144 mg/L  $\text{ZnSO}_4 \cdot 7\text{H}_2\text{O}$ , 0.05 mg/L  $\text{CuSO}_4 \cdot 5\text{H}_2\text{O}$ , 0.028 mg/L  $\text{CoSO}_4 \cdot 7\text{H}_2\text{O}$ , 0.024 mg/L  $\text{Na}_2\text{MoO}_4 \cdot 2\text{H}_2\text{O}$ )

Antibiotics were added to *S. meliloti* or *A. tumefaciens* cultures at the following concentrations: streptomycin, 600 mg/L, gentamicin, 40 mg/L, kanamycin, 200 mg/L tetracyclin, 10 mg/L. For liquid cultures of *S. meliloti* antibiotic concentrations were reduced to the half. For *E. coli*, 100 mg/L ampicillin, 10 mg/L gentamicin, 50 mg/L kanamycin and 5 mg/L tetracyclin were used.

**TABLE S1** Strains and plasmids used in this study.

| Strain or plasmid                                    | Properties                                                         | Reference                          |
|------------------------------------------------------|--------------------------------------------------------------------|------------------------------------|
| <b><i>S. meliloti</i></b>                            |                                                                    |                                    |
| Rm2011                                               | Wild type, Str <sup>r</sup>                                        | Casse <i>et al.</i> (1979)         |
| Rm101                                                | Rm2011 <i>mucR</i> ::Spec <sup>r</sup>                             | Becker <i>et al.</i> (1997)        |
| Sm2B5001                                             | Rm2011 $\Delta rem$                                                | Bahlawane <i>et al.</i> (2008)     |
| Rm2011mTn5STM.1.08.H02                               | Rm2011 mTn5 insertion into <i>rem</i>                              | Pobigaylo <i>et al.</i> (2006)     |
| Rm2011mTn5STM.1.08.B07                               | Rm2011 mTn5 insertion into <i>flgH</i>                             | Pobigaylo <i>et al.</i> (2006)     |
| Rm2011mTn5STM.2.11.F09                               | Rm2011 mTn5 insertion into <i>SMa0453-SMa0461</i> intergenic locus | Pobigaylo <i>et al.</i> (2006)     |
| Sm2B3001                                             | Rm2011 restored <i>expR</i>                                        | Bahlawane <i>et al.</i> (2008)     |
| Rm2011 <i>expR</i> <sup>+</sup> <i>exoY wgeB</i>     | Sm2B3001 $\Delta exoY wgeB$ ::pK18mob2-mCh                         | Charoenpanich <i>et al.</i> (2015) |
| Rm2011 <i>expR</i> <sup>+</sup> <i>sinI</i>          | Sm2B3001 $\Delta sinI$                                             | McIntosh <i>et al.</i> (2009)      |
| Rm2011 <i>exoY</i>                                   | Rm2011 $\Delta exoY$                                               | This work                          |
| Rm2011 <i>exoY wgeB</i>                              | Rm2011 $\Delta exoY wgeB$ ::pK18mob2-mCh                           | This work                          |
| <i>mucR exoY wgeB</i>                                | Rm101 $\Delta exoY wgeB$ ::pK18mob2-mCh                            | This work                          |
| <i>mucR SMC01792</i>                                 | Rm101 <i>SMC01792</i> ::pK19mob2 $\Omega$ HMB                      | This work                          |
| Rm2011 <i>expR</i> <sup>+</sup> <i>SMC01792</i>      | Sm2B3001 <i>SMC01792</i> ::pK19mob2 $\Omega$ HMB                   | This work                          |
| Rm2011 <i>expR</i> <sup>+</sup> <i>sinI SMC01792</i> | Sm2B3001 $\Delta sinI SMC01792$ ::pK19mob2 $\Omega$ HMB            | This work                          |
| Rm2011 <i>pilA1</i>                                  | Rm2011 $\Delta pilA1$                                              | This work                          |
| Rm2011 <i>pleD</i>                                   | Rm2011 <i>pleD</i> ::pK19mob2 $\Omega$ HMB                         | This work                          |
| Rm2011 <i>SMa0137</i>                                | Rm2011 <i>SMa0137</i> ::pK19mob2 $\Omega$ HMB                      | This work                          |
| Rm2011 <i>SMa0369</i>                                | Rm2011 $\Delta SMa0369$                                            | This work                          |
| Rm2011 <i>SMa1548</i>                                | Rm2011 <i>SMa1548</i> ::pK19mob2 $\Omega$ HMB                      | This work                          |
| Rm2011 <i>SMa2301</i>                                | Rm2011 <i>SMa2301</i> ::pK19mob2 $\Omega$ HMB                      | This work                          |
| Rm2011 <i>SMb20389</i>                               | Rm2011 <i>SMb20389</i> ::pK19mob2 $\Omega$ HMB                     | This work                          |
| Rm2011 <i>SMb20447</i>                               | Rm2011 <i>SMb20447</i> ::pK19mob2 $\Omega$ HMB                     | This work                          |
| Rm2011 <i>SMb20523</i>                               | Rm2011 <i>SMb20523</i> ::pK19mob2 $\Omega$ HMB                     | This work                          |
| Rm2011 <i>SMb20900</i>                               | Rm2011 <i>SMb20900</i> ::pK19mob2 $\Omega$ HMB                     | This work                          |
| Rm2011 <i>SMb21517</i>                               | Rm2011 <i>SMb21517</i> ::pK19mob2 $\Omega$ HMB                     | This work                          |
| Rm2011 <i>SMc00033</i>                               | Rm2011 <i>SMc00033</i> ::pK19mob2 $\Omega$ HMB                     | This work                          |
| Rm2011 <i>SMc00038</i>                               | Rm2011 <i>SMc00038</i> ::pK19mob2 $\Omega$ HMB                     | This work                          |
| Rm2011 <i>SMc00507</i>                               | Rm2011 $\Delta SMC00507$ ( $\Delta mcrA$ )                         | This work                          |
| Rm2011 <i>SMc00507 SMC00999</i>                      | <i>SMc00507 SMC00999</i> ::pK19mob2 $\Omega$ HMB                   | This work                          |
| Rm2011 <i>SMc00887</i>                               | Rm2011 <i>SMc00887</i> ::pK19mob2 $\Omega$ HMB                     | This work                          |
| Rm2011 <i>SMc00992</i>                               | Rm2011 <i>SMc00992</i> ::pK19mob2 $\Omega$ HMB                     | This work                          |
| Rm2011 <i>SMc00999</i>                               | Rm2011 <i>SMc00999</i> ::pK19mob2 $\Omega$ HMB                     | This work                          |
| Rm2011 <i>SMc01464</i>                               | Rm2011 <i>SMc01464</i> ::pK19mob2 $\Omega$ HMB                     | This work                          |
| Rm2011 <i>SMc01792</i>                               | Rm2011 <i>SMc01792</i> ::pK19mob2 $\Omega$ HMB                     | This work                          |
| Rm2011 <i>SMc03141</i>                               | Rm2011 <i>SMc03141</i> ::pK19mob2 $\Omega$ HMB                     | This work                          |
| Rm2011 <i>SMc03178</i>                               | Rm2011 <i>SMc03178</i> ::pK19mob2 $\Omega$ HMB                     | This work                          |
| Rm2011 <i>SMc03942</i>                               | Rm2011 <i>SMc03942</i> ::pK19mob2 $\Omega$ HMB                     | This work                          |
| Rm2011 <i>SMc04015</i>                               | Rm2011 <i>SMc04015</i> ::pK19mob2 $\Omega$ HMB                     | This work                          |
| Rm2011 $\Delta I$                                    | Rm2011 $\Delta pleD$                                               | This work                          |
| Rm2011 $\Delta II$                                   | Rm2011 $\Delta I \Delta SMC04015$                                  | This work                          |
| Rm2011 $\Delta III$                                  | Rm2011 $\Delta II \Delta SMb20523$                                 | This work                          |
| Rm2011 $\Delta IV$                                   | Rm2011 $\Delta III \Delta SMC01464$                                | This work                          |
| Rm2011 $\Delta V$                                    | Rm2011 $\Delta IV \Delta SMa2301$                                  | This work                          |
| Rm2011 $\Delta VI$                                   | Rm2011 $\Delta V \Delta SMb20389$                                  | This work                          |
| Rm2011 $\Delta VII$                                  | Rm2011 $\Delta VI \Delta SMb20447$                                 | This work                          |
| Rm2011 $\Delta VIII$                                 | Rm2011 $\Delta VII \Delta SMb20900$                                | This work                          |
| Rm2011 $\Delta IX$                                   | Rm2011 $\Delta VIII \Delta SMC00038$                               | This work                          |
| Rm2011 $\Delta X$                                    | Rm2011 $\Delta IX \Delta SMa1548$                                  | This work                          |
| Rm2011 $\Delta XI$                                   | Rm2011 $\Delta X \Delta SMC03178$                                  | This work                          |
| Rm2011 $\Delta XII$                                  | Rm2011 $\Delta XI \Delta SMa0137$                                  | This work                          |
| Rm2011 $\Delta XIII$                                 | Rm2011 $\Delta XII \Delta SMC00992$                                | This work                          |
| Rm2011 $\Delta XIV$                                  | Rm2011 $\Delta XIII \Delta SMC03942$                               | This work                          |
| Rm2011 $\Delta XV$                                   | Rm2011 $\Delta XIV \Delta SMC00887$                                | This work                          |
| Rm2011 $\Delta XVI$                                  | Rm2011 $\Delta XV \Delta SMC00033$                                 | This work                          |
| Rm2011 <i>expR</i> <sup>+</sup> $\Delta I$           | Sm2B3001 $\Delta pleD$                                             | This work                          |
| Rm2011 <i>expR</i> <sup>+</sup> $\Delta II$          | Rm2011 <i>expR</i> <sup>+</sup> $\Delta I \Delta SMC04015$         | This work                          |
| Rm2011 <i>expR</i> <sup>+</sup> $\Delta III$         | Rm2011 <i>expR</i> <sup>+</sup> $\Delta II \Delta SMb20523$        | This work                          |
| Rm2011 <i>expR</i> <sup>+</sup> $\Delta IV$          | Rm2011 <i>expR</i> <sup>+</sup> $\Delta III \Delta SMC01464$       | This work                          |
| Rm2011 <i>expR</i> <sup>+</sup> $\Delta V$           | Rm2011 <i>expR</i> <sup>+</sup> $\Delta IV \Delta SMa2301$         | This work                          |
| Rm2011 <i>expR</i> <sup>+</sup> $\Delta VI$          | Rm2011 <i>expR</i> <sup>+</sup> $\Delta V \Delta SMb20389$         | This work                          |
| Rm2011 <i>expR</i> <sup>+</sup> $\Delta VII$         | Rm2011 <i>expR</i> <sup>+</sup> $\Delta VI \Delta SMb20447$        | This work                          |
| Rm2011 <i>expR</i> <sup>+</sup> $\Delta VIII$        | Rm2011 <i>expR</i> <sup>+</sup> $\Delta VII \Delta SMb20900$       | This work                          |
| Rm2011 <i>expR</i> <sup>+</sup> $\Delta IX$          | Rm2011 <i>expR</i> <sup>+</sup> $\Delta VIII \Delta SMC00038$      | This work                          |
| Rm2011 <i>expR</i> <sup>+</sup> $\Delta X$           | Rm2011 <i>expR</i> <sup>+</sup> $\Delta IX \Delta SMa1548$         | This work                          |
| Rm2011 <i>expR</i> <sup>+</sup> $\Delta XI$          | Rm2011 <i>expR</i> <sup>+</sup> $\Delta X \Delta SMC03178$         | This work                          |
| Rm2011 <i>expR</i> <sup>+</sup> $\Delta XII$         | Rm2011 <i>expR</i> <sup>+</sup> $\Delta XI \Delta SMa0137$         | This work                          |
| Rm2011 <i>expR</i> <sup>+</sup> $\Delta XIII$        | Rm2011 <i>expR</i> <sup>+</sup> $\Delta XII \Delta SMC00992$       | This work                          |

|                                                      |                                                                                                                                                                                                           |                                  |
|------------------------------------------------------|-----------------------------------------------------------------------------------------------------------------------------------------------------------------------------------------------------------|----------------------------------|
| Rm2011 <i>expR</i> <sup>+</sup> ΔXIV                 | Rm2011 <i>expR</i> <sup>+</sup> ΔXIII <i>SMc03942</i>                                                                                                                                                     | This work                        |
| Rm2011 <i>expR</i> <sup>+</sup> ΔXV                  | Rm2011 <i>expR</i> <sup>+</sup> ΔXIV <i>SMc00887</i>                                                                                                                                                      | This work                        |
| Rm2011 <i>expR</i> <sup>+</sup> ΔXVI                 | Rm2011 <i>expR</i> <sup>+</sup> ΔXV <i>SMc00033</i>                                                                                                                                                       | This work                        |
| Rm2011 Gm <sup>R</sup>                               | Rm2011 pSM10 integrated into the chromosome                                                                                                                                                               | This work                        |
| Rm2011 ΔXVI Gm <sup>R</sup>                          | Rm2011 ΔXVI pSM10 integrated into the chromosome                                                                                                                                                          | This work                        |
| Rm2011 <i>expR</i> <sup>+</sup> Gm <sup>R</sup>      | Sm2B3001 pSM10 integrated into the chromosome                                                                                                                                                             | This work                        |
| Rm2011 <i>expR</i> <sup>+</sup> ΔXVI Gm <sup>R</sup> | Rm2011 <i>expR</i> <sup>+</sup> ΔXVI pSM10 integrated into the chromosome                                                                                                                                 | This work                        |
| PleD-EGFP                                            | Rm2011 <i>pleD::pK18mob2-pleD-egfp</i>                                                                                                                                                                    | This work                        |
| SMB20447-EGFP                                        | Rm2011 <i>SMB20447::pK18mob2-SMB20447-EGFP</i>                                                                                                                                                            | This work                        |
| SMB20523-EGFP                                        | Rm2011 <i>SMB20523::pK18mob2-SMB20523-EGFP</i>                                                                                                                                                            | This work                        |
| SMB21517-EGFP                                        | Rm2011 <i>SMB21517::pK18mob2-SMB21517-EGFP</i>                                                                                                                                                            | This work                        |
| SMc01464-EGFP                                        | Rm2011 <i>SMc01464::pK18mob2-SMc01464-EGFP</i>                                                                                                                                                            | This work                        |
| SMc03178-EGFP                                        | Rm2011 <i>SMc03178::pK18mob2-SMc03178-EGFP</i>                                                                                                                                                            | This work                        |
| <b>A. tumefaciens</b>                                |                                                                                                                                                                                                           |                                  |
| NTL4 (pZLR4)                                         | Derivative of NT1 with an internal deletion of the <i>tetC58</i> locus, <i>traG-lacZ</i> , Gm <sup>r</sup>                                                                                                | Shaw <i>et al.</i> (1997)        |
| <b>E. coli</b>                                       |                                                                                                                                                                                                           |                                  |
| S17-1                                                | <i>E. coli</i> 294 Thi RP4-2-Tc::Mu-Km::Tn7 integrated into the chromosome                                                                                                                                | Simon <i>et al.</i> (1983)       |
| DH5α                                                 | F <sup>-</sup> <i>endA1 supE44 thi-1-recA1 gyrA96 relA1 deoRD(lacZYA-argF)U169</i>                                                                                                                        | Grant <i>et al.</i> (1990)       |
| M15pREP4                                             | Nx <sup>s</sup> Str <sup>s</sup> Rif <sup>s</sup> Thi <sup>-</sup> Lac <sup>-</sup> Ara <sup>+</sup> Gal <sup>+</sup> Mtl <sup>r</sup> F <sup>-</sup> RecA <sup>+</sup> Uvr <sup>+</sup> Lon <sup>+</sup> | Qiagen, Hilden, Germany          |
| <b>Plasmid</b>                                       |                                                                                                                                                                                                           |                                  |
| pDJS31                                               | pET24b(+); <i>dgcAWT</i> , Km <sup>r</sup>                                                                                                                                                                | Skotnicka <i>et al.</i> (2015)   |
| pK18mob2-EGFP                                        | pK18mob2::EGFP, <i>lacZ</i> , <i>mob</i> , Km <sup>r</sup>                                                                                                                                                | N. Meier                         |
| pK18mobsacB                                          | <i>lacZ</i> , <i>mob</i> , <i>sacB</i> , Km <sup>r</sup>                                                                                                                                                  | Schäfer <i>et al.</i> (1994)     |
| pK19mob2ΩHMB                                         | integrative plasmid containing a transcription-termination sequence, Km <sup>r</sup>                                                                                                                      | Luo <i>et al.</i> (2005)         |
| pPHU231-EGFP                                         | broad-host-range low copy expression vector containing <i>egfp</i> , used for generating promoter-EGFP fusions, Tc <sup>r</sup>                                                                           | M. McIntosh                      |
| pMMB67EH                                             | broad-host-range expression vector containing <i>tac</i> promoter, Gm <sup>r</sup>                                                                                                                        | Fürste <i>et al.</i> (1986)      |
| pSM10                                                | <i>S. meliloti</i> integrative vector containing partial <i>recA</i> and <i>alaS</i> sequences, Gm <sup>r</sup>                                                                                           | Selbitschka <i>et al.</i> (1995) |
| pSRKKm                                               | pBBR1MCS-2-derived broad-host-range expression vector containing <i>lac</i> promoter and <i>lacI</i> <sup>r</sup> , <i>lacZα</i> <sup>+</sup> , Km <sup>r</sup>                                           | Khan <i>et al.</i> (2008)        |
| pWBT                                                 | pSRKGm containing T5 promoter, Gm <sup>r</sup>                                                                                                                                                            | M. McIntosh                      |
| pWH844                                               | expression vector containing His <sub>6</sub> -tag sequence and T5 promoter, Amp <sup>r</sup>                                                                                                             | Schirmer <i>et al.</i> (1997)    |
| pSRKKm-EGFP                                          | pSRKKm containing EGFP, Km <sup>r</sup>                                                                                                                                                                   | This work                        |
| pSRKGm- <i>parB-mcherry</i>                          | pSRKGm carrying <i>S. meliloti parB</i> translationally fused to mCherry, Gm <sup>r</sup>                                                                                                                 | This work                        |
| Integrative plasmids for gene mutation               |                                                                                                                                                                                                           |                                  |
| pK19mob2ΩHMB- <i>SMB20389</i>                        | pK19mob2ΩHMB carrying internal fragment of <i>SMB20389</i>                                                                                                                                                | Becker <i>et al.</i> (2009)      |
| pK18mob2- <i>wgeB</i> -mCh                           | pK18mob2-mCh carrying internal fragment of <i>wgeB</i>                                                                                                                                                    | P. Charoenpanich                 |
| pK19mob2ΩHMB- <i>pleD</i>                            | pK19mob2ΩHMB carrying internal fragment of <i>pleD</i>                                                                                                                                                    | This work                        |
| pK19mob2ΩHMB- <i>SMa2301</i>                         | pK19mob2ΩHMB carrying internal fragment of <i>SMa2301</i>                                                                                                                                                 | This work                        |
| pK19mob2ΩHMB- <i>SMB20523</i>                        | pK19mob2ΩHMB carrying internal fragment of <i>SMB20523</i>                                                                                                                                                | This work                        |
| pK19mob2ΩHMB- <i>SMc01464</i>                        | pK19mob2ΩHMB carrying internal fragment of <i>SMc01464</i>                                                                                                                                                | This work                        |
| pK19mob2ΩHMB- <i>SMc04015</i>                        | pK19mob2ΩHMB carrying internal fragment of <i>SMc04015</i>                                                                                                                                                | This work                        |
| pK19mob2ΩHMB- <i>SMa0137</i>                         | pK19mob2ΩHMB carrying internal fragment of <i>SMa0137</i>                                                                                                                                                 | This work                        |
| pK19mob2ΩHMB- <i>SMa1548</i>                         | pK19mob2ΩHMB carrying internal fragment of <i>SMa1548</i>                                                                                                                                                 | This work                        |
| pK19mob2ΩHMB- <i>SMB20447</i>                        | pK19mob2ΩHMB carrying internal fragment of <i>SMB20447</i>                                                                                                                                                | This work                        |
| pK19mob2ΩHMB- <i>SMB20900</i>                        | pK19mob2ΩHMB carrying internal fragment of <i>SMB20900</i>                                                                                                                                                | This work                        |
| pK19mob2ΩHMB- <i>SMc00033</i>                        | pK19mob2ΩHMB carrying internal fragment of <i>SMc00033</i>                                                                                                                                                | This work                        |
| pK19mob2ΩHMB- <i>SMc00038</i>                        | pK19mob2ΩHMB carrying internal fragment of <i>SMc00038</i>                                                                                                                                                | This work                        |
| pK19mob2ΩHMB- <i>SMc00074</i>                        | pK19mob2ΩHMB carrying internal fragment of <i>SMc00074</i>                                                                                                                                                | This work                        |
| pK19mob2ΩHMB- <i>SMc00887</i>                        | pK19mob2ΩHMB carrying internal fragment of <i>SMc00887</i>                                                                                                                                                | This work                        |
| pK19mob2ΩHMB- <i>SMc00992</i>                        | pK19mob2ΩHMB carrying internal fragment of <i>SMc00992</i>                                                                                                                                                | This work                        |
| pK19mob2ΩHMB- <i>SMc03141</i>                        | pK19mob2ΩHMB carrying internal fragment of <i>SMc03141</i>                                                                                                                                                | This work                        |
| pK19mob2ΩHMB- <i>SMc03178</i>                        | pK19mob2ΩHMB carrying internal fragment of <i>SMc03178</i>                                                                                                                                                | This work                        |
| pK19mob2ΩHMB- <i>SMc03942</i>                        | pK19mob2ΩHMB carrying internal fragment of <i>SMc03942</i>                                                                                                                                                | This work                        |
| pK19mob2ΩHMB- <i>SMB21517</i>                        | pK19mob2ΩHMB carrying internal fragment of <i>SMB21517</i>                                                                                                                                                | This work                        |
| pK19mob2ΩHMB- <i>SMc00999</i>                        | pK19mob2ΩHMB carrying internal fragment of <i>SMc00999</i>                                                                                                                                                | This work                        |
| pK19mob2ΩHMB- <i>SMc01792</i>                        | pK19mob2ΩHMB carrying internal fragment of <i>SMc01792</i>                                                                                                                                                | This work                        |
| Integrative plasmids for C-terminal EGFP tagging     |                                                                                                                                                                                                           |                                  |
| pK18mob2- <i>pleD</i> -EGFP                          | pK18mob2-EGFP carrying C-terminal portion of <i>pleD</i>                                                                                                                                                  | This work                        |
| pK18mob2- <i>SMB20523</i> -EGFP                      | pK18mob2-EGFP carrying C-terminal portion of <i>SMB20523</i>                                                                                                                                              | This work                        |
| pK18mob2- <i>SMc01464</i> -EGFP                      | pK18mob2-EGFP carrying C-terminal portion of <i>SMc01464</i>                                                                                                                                              | This work                        |
| pK18mob2- <i>SMB20447</i> -EGFP                      | pK18mob2-EGFP carrying C-terminal portion of <i>SMB20447</i>                                                                                                                                              | This work                        |
| pK18mob2- <i>SMc03178</i> -EGFP                      | pK18mob2-EGFP carrying C-terminal portion of <i>SMc03178</i>                                                                                                                                              | This work                        |

|                                                    |                                                                                                                     |                                    |
|----------------------------------------------------|---------------------------------------------------------------------------------------------------------------------|------------------------------------|
| pK18mob2-SMb21517-EGFP                             | pK18mob2-EGFP carrying C-terminal portion of <i>SMb21517</i>                                                        | This work                          |
| <b>Deletion constructs</b>                         |                                                                                                                     |                                    |
| pK18mobsacB- <i>exoY</i>                           | pK18mobsacB carrying flanking regions of <i>exoY</i>                                                                | P. Charoenpanich                   |
| pK18mobsacB- <i>pleD</i>                           | pK18mobsacB carrying flanking regions of <i>pleD</i>                                                                | This work                          |
| pK18mobsacB-SMa2301                                | pK18mobsacB carrying flanking regions of <i>SMa2301</i>                                                             | This work                          |
| pK18mobsacB-SMb20389                               | pK18mobsacB carrying flanking regions of <i>SMb20389</i>                                                            | This work                          |
| pK18mobsacB-SMb20523                               | pK18mobsacB carrying flanking regions of <i>SMb20523</i>                                                            | This work                          |
| pK18mobsacB-SMc01464                               | pK18mobsacB carrying flanking regions of <i>SMc01464</i>                                                            | This work                          |
| pK18mobsacB-SMc04015                               | pK18mobsacB carrying flanking regions of <i>SMc04015</i>                                                            | This work                          |
| pK18mobsacB-SMa0137                                | pK18mobsacB carrying flanking regions of <i>SMa0137</i>                                                             | This work                          |
| pK18mobsacB-SMa1548                                | pK18mobsacB carrying flanking regions of <i>SMa1548</i>                                                             | This work                          |
| pK18mobsacB-SMb20447                               | pK18mobsacB carrying flanking regions of <i>SMb20447</i>                                                            | This work                          |
| pK18mobsacB-SMb20900                               | pK18mobsacB carrying flanking regions of <i>SMb20900</i>                                                            | This work                          |
| pK18mobsacB-SMc00033                               | pK18mobsacB carrying flanking regions of <i>SMc00033</i>                                                            | This work                          |
| pK18mobsacB-SMc00038                               | pK18mobsacB carrying flanking regions of <i>SMc00038</i>                                                            | This work                          |
| pK18mobsacB-SMc00887                               | pK18mobsacB carrying flanking regions of <i>SMc00887</i>                                                            | This work                          |
| pK18mobsacB-SMc00992                               | pK18mobsacB carrying flanking regions of <i>SMc00992</i>                                                            | This work                          |
| pK18mobsacB-SMc03178                               | pK18mobsacB carrying flanking regions of <i>SMc03178</i>                                                            | This work                          |
| pK18mobsacB-SMc03942                               | pK18mobsacB carrying flanking regions of <i>SMc03942</i>                                                            | This work                          |
| pK18mobsacB-SMa0369                                | pK18mobsacB carrying flanking regions of <i>SMa0369</i>                                                             | This work                          |
| pK18mobsacB-SMc00507                               | pK18mobsacB carrying flanking regions of <i>SMc00507</i> ( <i>mcrA</i> )                                            | This work                          |
| pK18mobsacB- <i>pilA1</i>                          | pK18mobsacB carrying flanking regions of <i>pilA1</i>                                                               | This work                          |
| <b>Overexpression constructs</b>                   |                                                                                                                     |                                    |
| pWBT-SMb20447                                      | pWBT carrying <i>SMb20447</i> coding sequence                                                                       | P. Charoenpanich                   |
| pWBT- <i>pleD</i>                                  | pWBT carrying <i>pleD</i> coding sequence                                                                           | This work                          |
| pWBT- <i>pleD</i> <sub>GGAAF</sub>                 | pWBT carrying <i>pleD</i> <sub>GGAAF</sub> coding sequence                                                          | This work                          |
| pWBT-SMa2301                                       | pWBT carrying <i>SMa2301</i> coding sequence                                                                        | This work                          |
| pWBT-SMb20389                                      | pWBT carrying <i>SMb20389</i> coding sequence                                                                       | This work                          |
| pWBT-SMb20523                                      | pWBT carrying <i>SMb20523</i> coding sequence                                                                       | This work                          |
| pWBT-SMc01464                                      | pWBT carrying <i>SMc01464</i> coding sequence                                                                       | This work                          |
| pWBT-SMc04015                                      | pWBT carrying <i>SMc04015</i> coding sequence                                                                       | This work                          |
| pWBT-SMa0137                                       | pWBT carrying <i>SMa0137</i> coding sequence                                                                        | This work                          |
| pWBT-SMa1548                                       | pWBT carrying <i>SMa1548</i> coding sequence                                                                        | This work                          |
| pWBT-SMb20900                                      | pWBT carrying <i>SMb20900</i> coding sequence                                                                       | This work                          |
| pWBT-SMc00033                                      | pWBT carrying <i>SMc00033</i> coding sequence                                                                       | This work                          |
| pWBT-SMc00038                                      | pWBT carrying <i>SMc00038</i> coding sequence                                                                       | This work                          |
| pWBT-SMc00074                                      | pWBT carrying <i>SMc00074</i> coding sequence                                                                       | This work                          |
| pWBT-SMc00887                                      | pWBT carrying <i>SMc00887</i> coding sequence                                                                       | This work                          |
| pWBT-SMc00992                                      | pWBT carrying <i>SMc00992</i> coding sequence                                                                       | This work                          |
| pWBT-SMc03178                                      | pWBT carrying <i>SMc03178</i> coding sequence                                                                       | This work                          |
| pWBT-SMc03942                                      | pWBT carrying <i>SMc03942</i> coding sequence                                                                       | This work                          |
| pWBT-SMb21517                                      | pWBT carrying <i>SMb21517</i> coding sequence                                                                       | This work                          |
| pWBT-SMc00507                                      | pWBT carrying <i>SMc00507</i> ( <i>mcrA</i> ) coding sequence                                                       | This work                          |
| pWBT-SMc00999                                      | pWBT carrying <i>SMc00999</i> coding sequence                                                                       | This work                          |
| pWBT- <i>pleD</i> - <i>SMc00507</i>                | pWBT carrying <i>pleD</i> and <i>SMc00507</i> ( <i>mcrA</i> ) coding sequences                                      | This work                          |
| pWBT- <i>pleD</i> <i>SMc00507</i> <sub>AxxxA</sub> | pWBT carrying <i>pleD</i> and <i>SMc00507</i> <sub>AxxxA</sub> ( <i>mcrA</i> <sub>AxxxA</sub> ) coding sequences    | This work                          |
| pWBT- <i>dgcA</i>                                  | pWBT carrying <i>C. crescentus dgcA</i> coding sequence                                                             | This work                          |
| pWBT- <i>yjhH</i>                                  | pWBT carrying <i>E. coli yjhH</i> coding sequence                                                                   | This work                          |
| pSRKKm-PT5- <i>pleD</i>                            | NdeI/HindIII fragment from pWBT- <i>pleD</i> cloned into pSRKKm                                                     | This work                          |
| pMMB67EH- <i>pleD</i>                              | EcoRI/HindIII fragment from pWBT- <i>pleD</i> cloned into pMMB67EH                                                  | This work                          |
| pWH844- <i>McrA</i>                                | pWH844 carrying <i>SMc00507</i> ( <i>mcrA</i> ) coding sequence                                                     | This work                          |
| pWH844- <i>McrA</i> <sub>AxxxA</sub>               | pWH844 carrying <i>SMc00507</i> <sub>AxxxA</sub> ( <i>mcrA</i> <sub>AxxxA</sub> ) coding sequence                   | This work                          |
| pWH844- <i>McrA</i> <sub>D35A/S37A/G40A</sub>      | pWH844 carrying <i>SMc00507</i> <sub>D35A/S37A/G40A</sub> ( <i>mcrA</i> <sub>D35A/S37A/G40A</sub> ) coding sequence | This work                          |
| pWH844- <i>SMc00074</i> <sub>390-970</sub>         | pWH844 carrying <i>SMc00074</i> (aa 390-970) coding sequence                                                        | This work                          |
| <b>FRET-based biosensor constructs</b>             |                                                                                                                     |                                    |
| pMMB67EH-Spy                                       | pMMB67EH containing synthetic <i>ycgR</i> fused to CYPet and YPet                                                   | Christen <i>et al.</i> (2010)      |
| pMMB67EH-CYPet-12aa-YPet                           | pMMB67EH containing a 12 aa linker fused to CYPet and YPet                                                          | This work                          |
| pMMB67EH-CYPet- <i>mcrA</i> -YPet                  | pMMB67EH containing <i>SMc00507</i> ( <i>mcrA</i> ) fused to CYPet and YPet                                         | This work                          |
| <b>Promoter-EGFP fusion plasmids</b>               |                                                                                                                     |                                    |
| pLK115                                             | pPHU231-EGFP containing <i>wgeA</i> promoter                                                                        | Charoenpanich <i>et al.</i> (2013) |
| pLK64                                              | pPHU231-EGFP containing <i>sinI</i> promoter                                                                        | McIntosh <i>et al.</i> (2008)      |
| pPHU231-P <sub>exoY</sub> -EGFP                    | pPHU231-EGFP containing <i>exoY</i> promoter                                                                        | This work                          |
| pPHU231-P <sub>SMc00507</sub> <sub>ATG</sub> -EGFP | pPHU231-EGFP containing <i>SMc00507</i> <sub>ATG</sub> promoter                                                     | This work                          |
| pPHU231-P <sub>SMc00507</sub> <sub>TG</sub> -EGFP  | pPHU231-EGFP containing <i>SMc00507</i> <sub>TG</sub> promoter                                                      | This work                          |
| pSRKKm-P <sub>SMc01794</sub> -EGFP                 | pSRKKm-EGFP containing <i>SMc01794</i> promoter                                                                     | This work                          |

**TABLE S2** Primers used in this study.

| Primer                  | Sequence                          | Purpose                                         |
|-------------------------|-----------------------------------|-------------------------------------------------|
| <i>SMc03142</i> -stop-f | GTTTCGGCTGGATGCCGAGA              | <i>SMc03142</i> stop codon verification         |
| <i>SMc03142</i> -stop-r | ATCGACTCCTTCAGTGCATTG             |                                                 |
| <i>pleD</i> -int-f      | ATATAAGCTTACCAGCCAATGTGAAGCTCCT   | <i>pleD</i> internal fragment                   |
| <i>pleD</i> -int-r      | ATATCTGCAGTGCAGATCGTTCACGGGC      |                                                 |
| <i>SMa2301</i> -int-f   | ATATAAGCTTCCCTAGATGGGCAAGGATG     | <i>SMa2301</i> internal fragment                |
| <i>SMa2301</i> -int-r   | ATATCTGCAGTGAAGGCGGTGGCCAGAG      |                                                 |
| <i>SMb20523</i> -int-f  | ATATAAGCTTCTTCGTGGTTGCGTTTCTGA    | <i>SMb20523</i> internal fragment               |
| <i>SMb20523</i> -int-r  | ATATCTGCAGTGGATCAGGAAGAACGGCAT    |                                                 |
| <i>SMc01464</i> -int-f  | ATATAAGCTTAATGAGCTTCTCTCCGCCATA   | <i>SMc01464</i> internal fragment               |
| <i>SMc01464</i> -int-r  | ATATCTGCAGAAGGACGAGAAGTAGAGCTGCC  |                                                 |
| <i>SMc04015</i> -int-f  | ATATAAGCTTTATGATCCGCATGATCGACTG   | <i>SMc04015</i> internal fragment               |
| <i>SMc04015</i> -int-r  | ATATCTGCAGTACGTCCGTAATGTCAACGGC   |                                                 |
| <i>SMa0137</i> -int-f   | ATATAAGCTTATCGCAATGGCCTTGATG      | <i>SMa0137</i> internal fragment                |
| <i>SMa0137</i> -int-r   | ATATCTGCAGAGCTTCTGCTCGTTGGTCT     |                                                 |
| <i>SMa1548</i> -int-f   | ATATAAGCTTCTCTCCAGCGGCTTATGG      | <i>SMa1548</i> internal fragment                |
| <i>SMa1548</i> -int-r   | ATATCTGCAGTGATATCCACGATCGTTACGAC  |                                                 |
| <i>SMb20447</i> -int-f  | ATATAAGCTTCGCCATTCCGACGAACTT      | <i>SMb20447</i> internal fragment               |
| <i>SMb20447</i> -int-r  | ATATCTGCAGGGGTCGCCCTGATGTAGGAGAA  |                                                 |
| <i>SMb20900</i> -int-f  | ATATAAGCTTGAGCTTTTCCATCGCGGT      | <i>SMb20900</i> internal fragment               |
| <i>SMb20900</i> -int-r  | ATATCTGCAGGGTCGGGGATCAGGACGA      |                                                 |
| <i>SMc00033</i> -int-f  | ATATAAGCTTCCAAATCGTGACGCTTGC      | <i>SMc00033</i> internal fragment               |
| <i>SMc00033</i> -int-r  | ATATCTGCAGAGCAAAGCGAGGAAGGAGC     |                                                 |
| <i>SMc00038</i> -int-f  | ATATAAGCTTTGAACGCGGACGACAATG      | <i>SMc00038</i> internal fragment               |
| <i>SMc00038</i> -int-r  | ATATCTGCAGAAGATCGGTTCCGCCGTTT     |                                                 |
| <i>SMc00074</i> -int-f  | ATATAAGCTTGTCTGTCGACTCGTCTGT      | <i>SMc00074</i> internal fragment               |
| <i>SMc00074</i> -int-r  | ATATCTGCAGAGAGTATGCGCTGCGAGC      |                                                 |
| <i>SMc00887</i> -int-f  | ATATAAGCTTCGTTCTGTCGATCCATTGACC   | <i>SMc00887</i> internal fragment               |
| <i>SMc00887</i> -int-r  | ATATCTGCAGGCACTTCCCTTGAGCATCTGG   |                                                 |
| <i>SMc00992</i> -int-f  | ATATAAGCTTTGCAGGAGAGCCTGACGT      | <i>SMc00992</i> internal fragment               |
| <i>SMc00992</i> -int-r  | ATATCTGCAGTGCAGCCTGAGAAAGCGGT     |                                                 |
| <i>SMc03141</i> -int-f  | ATATAAGCTTCGGCACAGTGTGAGACG       | <i>SMc03141</i> internal fragment               |
| <i>SMc03141</i> -int-r  | ATATCTGCAGACGTGCCATCCAGCATCTT     |                                                 |
| <i>SMc03178</i> -int-f  | ATATAAGCTTCTACCTCCGGCCGTCAT       | <i>SMc03178</i> internal fragment               |
| <i>SMc03178</i> -int-r  | ATATCTGCAGGTAATCGAGGCCGATCGC      |                                                 |
| <i>SMc03942</i> -int-f  | ATATAAGCTTCGTAAGCTCGCTCTACCAGAAT  | <i>SMc03942</i> internal fragment               |
| <i>SMc03942</i> -int-r  | ATATCTGCAGGTGAGATCATCGAGGCAAGC    |                                                 |
| <i>SMb21517</i> -int-f  | ATATAAGCTTTGCAGCAGGTCAATGCGGT     | <i>SMb21517</i> internal fragment               |
| <i>SMb21517</i> -int-r  | ATATCTGCAGCAAGGCGCGAGGCCATTT      |                                                 |
| <i>SMc00999</i> -int-f  | ATATAAGCTTAGAACAGCGCCCCGAAAC      | <i>SMc00999</i> internal fragment               |
| <i>SMc00999</i> -int-r  | ATATCTGCAGAGCTTCTCGCGCTTGCCT      |                                                 |
| <i>SMc01792</i> -int-f  | ATATAAGCTTAAGGACGGGACAAGGGGCAAT   | <i>SMc01792</i> internal fragment               |
| <i>SMc01792</i> -int-r  | ATATCTGCAGCGATTTGAGAAAGAAGAGGCCGA |                                                 |
| <i>pleD</i> -C-f        | ATATGTCGACCCCGCTTCATTCCGATCCT     | <i>pleD</i> 3'-end for protein localization     |
| <i>pleD</i> -C-r        | ATATTCTAGAGGCAGCGCAGCGACGAC       |                                                 |
| <i>SMb20523</i> -C-f    | ATATGTCGACATCTATGCCGCAGTTGCG      | <i>SMb20523</i> 3' end for protein localization |
| <i>SMb20523</i> -C-r    | ATATTCTAGACGTGGTCGATACTTTCCAGA    |                                                 |

|                     |                                   |                                                 |
|---------------------|-----------------------------------|-------------------------------------------------|
| <i>SMc01464-C-f</i> | ATATGTCGACTTCGAGCCTGTTTCGATTTCT   | <i>SMc01464</i> 3'-end for protein localization |
| <i>SMc01464-C-r</i> | ATATTCTAGACGCCGAGTGGCGCAGTTC      |                                                 |
| <i>SMB20447-C-f</i> | ATATGTCGACCGGTCTGTCGGTTTCAAG      | <i>SMB20447</i> 3'-end for protein localization |
| <i>SMB20447-C-r</i> | ATATTCTAGATGTTTCGCTGAAGACCTGCC    |                                                 |
| <i>SMc03178-C-f</i> | ATATGTCGACAGTTCTGTCCGAGCTCGCT     | <i>SMc03178</i> 3'-end for protein localization |
| <i>SMc03178-C-r</i> | ATATTCTAGAGGCGCGCCACCGCCGCTCGAAGA |                                                 |
| <i>SMB21517-C-f</i> | ATATAAGCTTTTCGATACATGGTCGGTCTCG   | <i>SMB21517</i> 3'-end for protein localization |
| <i>SMB21517-C-r</i> | ATATTCTAGAGGAATGCAGCTGCCGCGAT     |                                                 |
| <i>pleD-l-f</i>     | ATATGAATTCAACGCAACGAGTCCGCCCAT    | <i>pleD</i> left flanking region                |
| <i>pleD-l-r</i>     | ATATTCTAGAATCGATCTTTCCGGCAGTCA    |                                                 |
| <i>pleD-r-f</i>     | ATATTCTAGATCCGCCGCACATGCTGAG      | <i>pleD</i> right flanking region               |
| <i>pleD-r-r</i>     | ATATAAGCTTCAATCGGTTGCCACGGCTTT    |                                                 |
| <i>SMA2301-l-f</i>  | ATATGAATTCTTTGGCTGGAAGACGACAC     | <i>SMA2301</i> left flanking region             |
| <i>SMA2301-l-r</i>  | ATATGGTACCTTCATATGGCAAATCGTGGC    |                                                 |
| <i>SMA2301-r-f</i>  | ATATGGTACCCGGCGCGACGAGAGCGGGATTA  | <i>SMA2301</i> right flanking region            |
| <i>SMA2301-r-r</i>  | ATATGGATCCTTGGCGAGCAAGGTTTCG      |                                                 |
| <i>SMB20389-l-f</i> | ATATGAATTCTTCGATGATCGGTGCGCA      | <i>SMB20389</i> left flanking region            |
| <i>SMB20389-l-r</i> | ATATGGTACCTTCTATCTCCCTCGTTCGTGA   |                                                 |
| <i>SMB20389-r-f</i> | ATATGGTACCGTCATCCTCGACGCCTGA      | <i>SMB20389</i> right flanking region           |
| <i>SMB20389-r-r</i> | ATATAAGCTTAGCATCGCGACATTCGTG      |                                                 |
| <i>SMB20523-l-f</i> | ATATGAATTCCATTGGCGGGCAATCAC       | <i>SMB20523</i> left flanking region            |
| <i>SMB20523-l-r</i> | ATATTCTAGATGGCAGAATCCAATATACGCA   |                                                 |
| <i>SMB20523-r-f</i> | ATATTCTAGAGCCAAGCGGGCAATTGAT      | <i>SMB20523</i> right flanking region           |
| <i>SMB20523-r-r</i> | ATATAAGCTTTATGCTGTGATGAGTTTCGGC   |                                                 |
| <i>SMc01464-l-f</i> | ATATGGATCCACGAGCCGGTCCACGTCGT     | <i>SMc01464</i> left flanking region            |
| <i>SMc01464-l-r</i> | ATATTCTAGATATGCGAGGCCATTGGTAA     |                                                 |
| <i>SMc01464-r-f</i> | ATATTCTAGACTTCTCGCACGATGGATCCT    | <i>SMc01464</i> right flanking region           |
| <i>SMc01464-r-r</i> | ATATAAGCTTATGCGGCAGACCTTAGTCTC    |                                                 |
| <i>SMc04015-l-f</i> | ATATGGATCCAGGTGTGACCGAGAGATTGA    | <i>SMc04015</i> left flanking region            |
| <i>SMc04015-l-r</i> | ATATTCTAGACAGGGCCTTGAGGTGATCA     |                                                 |
| <i>SMc04015-r-f</i> | ATATTCTAGACGCGTCAAGCGTCATACG      | <i>SMc04015</i> right flanking region           |
| <i>SMc04015-r-r</i> | ATATAAGCTTAATGCCTGTTGAAGGCC       |                                                 |
| <i>SMA0137-l-f</i>  | ATATGGATCCGCGCCCTGACGAATACCCA     | <i>SMA0137</i> left flanking region             |
| <i>SMA0137-l-r</i>  | ATATTCTAGACCGCACTCCTCCTGATAGG     |                                                 |
| <i>SMA0137-r-f</i>  | ATATTCTAGATTTTGGCCCCGAGCGTCCCTAA  | <i>SMA0137</i> right flanking region            |
| <i>SMA0137-r-r</i>  | ATATAAGCTTGCTGCTTGACGATACTGGCA    |                                                 |
| <i>SMA1548-l-f</i>  | ATATGGATCCACGGTAATGGCAGCGAT       | <i>SMA1548</i> left flanking region             |
| <i>SMA1548-l-r</i>  | ATATTCTAGAGACACGACACTTAGACCGGTGA  |                                                 |
| <i>SMA1548-r-f</i>  | ATATTCTAGACTCGATTGGCGCAGTTGC      | <i>SMA1548</i> right flanking region            |
| <i>SMA1548-r-r</i>  | ATATAAGCTTCGAGAAGCCCTGTACAAGGA    |                                                 |
| <i>SMB20447-l-f</i> | ATATGAATTCGCGCATTCTGTCAACGC       | <i>SMB20447</i> left flanking region            |
| <i>SMB20447-l-r</i> | ATATTCTAGATCTCGCCTTTCCCTTCCGTT    |                                                 |
| <i>SMB20447-r-f</i> | ATATTCTAGAAGTGGTCAATGCCGGGAAATTA  | <i>SMB20447</i> right flanking region           |
| <i>SMB20447-r-r</i> | ATATAAGCTTACCTCTTCGATGGCGCCTTTA   |                                                 |
| <i>SMB20900-l-f</i> | ATATGAATTCAGGTGCCCTCCGACACGATA    | <i>SMB20900</i> left flanking region            |
| <i>SMB20900-l-r</i> | ATATGGTACCCGCGATGAAATGCGTCA       |                                                 |
| <i>SMB20900-r-f</i> | ATATGGTACCCTCGTCATGAGACAAAAGGC    | <i>SMB20900</i> right flanking region           |
| <i>SMB20900-r-r</i> | ATATGGATCCGATGGTTGGCTTCAACCG      |                                                 |
| <i>SMc00033-l-f</i> | ATATGAATTCAATCAGCGGGAGGCGTCCAT    | <i>SMc00033</i> left flanking region            |

|                     |                                        |                                                             |
|---------------------|----------------------------------------|-------------------------------------------------------------|
| <i>SMc00033-l-r</i> | ATATTCTAGAGCCGGGCTCCAGGGATAGGACA       |                                                             |
| <i>SMc00033-r-f</i> | ATATTCTAGAGCAGCGATGCAAGGCGACCTTT       |                                                             |
| <i>SMc00033-r-r</i> | ATATGGTACCGCAGCACGACAGCCTTGAAAT        | <i>SMc00033</i> right flanking region                       |
| <i>SMc00038-l-f</i> | ATATGGATCCTTCGAGTACGGCAAAGGCTTT        |                                                             |
| <i>SMc00038-l-r</i> | ATATTCTAGAGCGAAACCTCCGAAGGAGC          | <i>SMc00038</i> left flanking region                        |
| <i>SMc00038-r-f</i> | ATATTCTAGATGTTCCGCGAGCGGCGGTAA         |                                                             |
| <i>SMc00038-r-r</i> | ATATAAGCTTATCATTTCGTTCCGGCGGC          | <i>SMc00038</i> right flanking region                       |
| <i>SMc00887-l-f</i> | ATATGGATCCAATGGCGAGGAGCTCGAC           |                                                             |
| <i>SMc00887-l-r</i> | ATATTCTAGATGTCATTGCGATCCGCTCCG         | <i>SMc00887</i> left flanking region                        |
| <i>SMc00887-r-f</i> | ATATTCTAGAGAGCATTATCGGGATACGGC         |                                                             |
| <i>SMc00887-r-r</i> | ATATAAGCTTTTCGCCTCCATGTGGATG           | <i>SMc00887</i> right flanking region                       |
| <i>SMc00992-l-f</i> | ATATGGTACCACTATGCGCCGGAATGGC           |                                                             |
| <i>SMc00992-l-r</i> | ATATTCTAGAGGTCACCTGGAAGTTCGCC          | <i>SMc00992</i> left flanking region                        |
| <i>SMc00992-r-f</i> | ATATTCTAGACGTCACTTGCAGAGAAGGA          |                                                             |
| <i>SMc00992-r-r</i> | ATATGAATTCTGCCGTGCAAAGGCAGAA           | <i>SMc00992</i> right flanking region                       |
| <i>SMc03178-l-f</i> | ATATGGATCCTCGCCGCTCGTCCGGCTTTT         |                                                             |
| <i>SMc03178-l-r</i> | ATATTCTAGAGGTGCGGCTTCAAAGAGCAAT        | <i>SMc03178</i> left flanking region                        |
| <i>SMc03178-r-f</i> | ATATTCTAGACCGGTATCCGGCCCTCGCCTTCA      |                                                             |
| <i>SMc03178-r-r</i> | ATATAAGCTTGTGCGGGCGTGTGCGTTATGG        | <i>SMc03178</i> right flanking region                       |
| <i>SMc03942-l-f</i> | ATATGGATCCTTCACGACCACATCCTGGC          |                                                             |
| <i>SMc03942-l-r</i> | ATATTCTAGAGAACCTAAGCTCCGGTTTGC         | <i>SMc03942</i> left flanking region                        |
| <i>SMc03942-r-f</i> | ATATTCTAGACGCCTTTCGGCGCAATGT           |                                                             |
| <i>SMc03942-r-r</i> | ATATAAGCTTTTGTCCCTCCAGGCGACAGCATT      | <i>SMc03942</i> right flanking region                       |
| <i>SMA0369-l-f</i>  | ATATGAATTCCTGGAGCCTCGGTCGGGA           |                                                             |
| <i>SMA0369-l-r</i>  | ATATTCTAGATCTGAGCCTCAACGGCCGC          | <i>SMA0369</i> left flanking region                         |
| <i>SMA0369-r-f</i>  | ATATGAATTCCTGGAGCCTCGGTCGGGA           |                                                             |
| <i>SMA0369-r-r</i>  | ATATTCTAGATCTGAGCCTCAACGGCCGC          | <i>SMA0369</i> right flanking region                        |
| <i>SMc00507-l-f</i> | ATATGAATTCAATATTCTCTCCGGGCCAGAA        |                                                             |
| <i>SMc00507-l-r</i> | ATATTCTAGATCTTCACATGGAGCACCTAAAG       | <i>SMc00507</i> left flanking region                        |
| <i>SMc00507-r-f</i> | ATATTCTAGACCTTGAGTGAAGGACCGGAT         |                                                             |
| <i>SMc00507-r-r</i> | ATATAAGCTTTGTGCCTCATATATCCAATCGC       | <i>SMc00507</i> right flanking region                       |
| <i>pilA1-l-f</i>    | ATATGAATTCCTAGGGTGAGGGGCAGGG           |                                                             |
| <i>pilA1-l-r</i>    | ATATTCTAGAGACTATTCTCCTCAAACCTCACTTGT   | <i>pilA1</i> left flanking region                           |
| <i>pilA1-r-f</i>    | ATATTCTAGACGGCCGACTGATTACCTAACA        |                                                             |
| <i>pilA1-r-r</i>    | ATATAAGCTTAGGTTGATCAGGAATTGGTGTA       | <i>pilA1</i> right flanking region                          |
| <i>pleD-f</i>       | ATATTCTAGAATGACTGCGGCATCCTC            |                                                             |
| <i>pleD-r</i>       | ATATAAGCTTTTCAGGCAGCGGCAGCGAC          | <i>pleD</i> ORF cloning                                     |
| <i>pleD-GGAAF-f</i> | gccgccTTCGTGGTCGTCATGCCGATA            |                                                             |
| <i>pleD-GGAAF-r</i> | TGACGACCACGAAggcggcCCCGCCGAAACGGCAGGCA | <i>pleD</i> GGEEF mutation to GGAAF                         |
| <i>SMA2301-f</i>    | ATATTCTAGAATGCAACTCGCGAGTTCAT          |                                                             |
| <i>SMA2301-r</i>    | ATATGTCGACCTATACGGTCGGCAGATCG          | <i>SMA2301</i> ORF cloning                                  |
| <i>SMB20389-f</i>   | ATATAAGCTTATTAAGAGGAGAAATCTAGAATGGGAC  |                                                             |
| <i>SMB20389-r</i>   | AAGCCGTACGAATC                         | <i>SMB20389</i> ORF cloning, usage of XbaI recognition site |
| <i>SMB20523-f</i>   | ATATGGTACCTCAGGCGTCGAGGATGACGAA        |                                                             |
| <i>SMB20523-r</i>   | ATATGTCGACATTAAGAGGAGAAATCTAGAATGGGC   | <i>SMB20523</i> ORF cloning, usage of XbaI recognition site |
| <i>SMc01464-f</i>   | GGTGCATCTCACTT                         |                                                             |
| <i>SMc01464-r</i>   | ATATGGTACCTTACGTCCGTGATACTTTCCA        |                                                             |
| <i>SMc04015-f</i>   | ATATTCTAGAATGGCTGAAACGCAAGCCG          | <i>SMc01464</i> ORF cloning                                 |
| <i>SMc04015-r</i>   | ATATAAGCTTTTCACGCCGAGTGGCGCAGTT        |                                                             |
| <i>SMc04015-f</i>   | ATATTCTAGAATGGGCTGCAAGCCGCA            |                                                             |
| <i>SMc04015-r</i>   | ATATGTCGACCTAAGGGGTCTGATCCGGG          | <i>SMc04015</i> ORF cloning                                 |



|                          |                                                |                                                                                                                                                      |
|--------------------------|------------------------------------------------|------------------------------------------------------------------------------------------------------------------------------------------------------|
| <i>SMa0137-f</i>         | ATATTCTAGAATGAGGTTTGTGGCTGGCAA                 |                                                                                                                                                      |
| <i>SMa0137-r</i>         | ATATGGTACCTCATGAGCGTGAGCTAGAAGAG               | <i>SMa0137</i> ORF cloning                                                                                                                           |
| <i>SMa1548-f</i>         | ATATTCTAGAATGAACGCACCGACGCC                    |                                                                                                                                                      |
| <i>SMa1548-r</i>         | ATATGGTACCTTAGAGGGAACCGGCCGC                   | <i>SMa1548</i> ORF cloning                                                                                                                           |
| <i>SMb20900-f</i>        | ATATTCTAGAATGCTCGCCTATGACGGGGGA                |                                                                                                                                                      |
| <i>SMb20900-r</i>        | ATATAAGCTTTTAAGCCCCTACCCGATGC                  | <i>SMb20900</i> ORF cloning                                                                                                                          |
| <i>SMc00033-f</i>        | ATATAAGCTTATTAAGAGGAGAAATCTAGAATGTCGG          |                                                                                                                                                      |
| <i>SMc00033-r</i>        | CCGCCCCCGCAGAAAT                               | <i>SMc00033</i> ORF cloning,<br>usage of XbaI recognition site                                                                                       |
| <i>SMc00033-f</i>        | ATATGGTACCTCAGGCGGGTTCGAGGGGCT                 |                                                                                                                                                      |
| <i>SMc00038-f</i>        | ATATTCTAGAATGGCAAGAAAAACGTCCC                  |                                                                                                                                                      |
| <i>SMc00038-r</i>        | ATATAAGCTTTACCGCCGCTCAGAGGAAA                  | <i>SMc00038</i> ORF cloning                                                                                                                          |
| <i>SMc00074-f</i>        | ATATTCTAGAATGCCCTGACCCGTAAG                    |                                                                                                                                                      |
| <i>SMc00074-r</i>        | ATATGGATCCTCAAGCCCGCTTCATCAG                   | <i>SMc00074</i> ORF cloning                                                                                                                          |
| <i>SMc00887-f</i>        | ATATTCTAGAATGACATTGCAGGAACTCGGTA               |                                                                                                                                                      |
| <i>SMc00887-r</i>        | ATATAAGCTTTAGCGCACCGCCGTATC                    | <i>SMc00887</i> ORF cloning                                                                                                                          |
| <i>SMc00992-f</i>        | ATATTCTAGAATGACCCTCGGCAAGCGT                   |                                                                                                                                                      |
| <i>SMc00992-r</i>        | ATATAAGCTTTAGCGCCGGCTTGCAGC                    | <i>SMc00992</i> ORF cloning                                                                                                                          |
| <i>SMc03178-f</i>        | ATATTCTAGAATGTCCCCTCTGTGCGCTTTCTC              |                                                                                                                                                      |
| <i>SMc03178-r</i>        | ATATAAGCTTTAGCGCGCGCCACCG                      | <i>SMc03178</i> ORF cloning                                                                                                                          |
| <i>SMc03942-f</i>        | ATATTCTAGAATGACCCGCAATGAACGGG                  |                                                                                                                                                      |
| <i>SMc03942-r</i>        | ATATGGTACCTCAGGCGGTCCGCTCCGC                   | <i>SMc03942</i> ORF cloning                                                                                                                          |
| <i>SMb21517-f</i>        | ATATAAGCTTATTAAGAGGAGAAATCTAGAATGGAAC          |                                                                                                                                                      |
| <i>SMb21517-r</i>        | ATCTGAGAAGATTCTGA                              | <i>SMb21517</i> ORF cloning,<br>usage of XbaI recognition site                                                                                       |
| <i>SMc00507-f</i>        | ATATAAGCTTATTAAGAGGAGAAATCTAGAATGGTTT          |                                                                                                                                                      |
| <i>SMc00507-r</i>        | ACAAGGACAGTGTTTCAG                             | <i>SMc00507</i> ORF cloning,<br>usage of XbaI recognition site; usage of<br>HindIII recognition site for combined<br>overexpression with <i>pleD</i> |
| <i>SMc00999-f</i>        | ATATTCTAGAATGTTCTCCTCCAGCATGCG                 |                                                                                                                                                      |
| <i>SMc00999-r</i>        | ATATGGTACCTTACAGAACTCGGTCAAGTGCCT              | <i>SMc00999</i> ORF cloning                                                                                                                          |
| <i>SMc00507-RxxxR-f</i>  | gccgcctctcgccGAAGAGACCAAGATAACCGGAA            |                                                                                                                                                      |
| <i>SMc00507-RxxxR-r</i>  | TCTTGGTCTCTTCggccgaagaggcgccctgaactgtcctgtgtaa | <i>SMc00507</i> mutation to R9A/R13A                                                                                                                 |
| <i>SMc00507-DxSxxG-f</i> | gcccttgccgacgaagccATCTGCTTCAGGCTGCTCTTC        |                                                                                                                                                      |
| <i>SMc00507-DxSxxG-r</i> | GCCTGAAGCAGATggcttcgctgcaagggcCACCAATCC        | <i>SMc00507</i> mutation to D35A/S37A/G40A                                                                                                           |
| <i>dgcA-f</i>            | ATATTCTAGAATGAAAATCTCAGGCGCCC                  |                                                                                                                                                      |
| <i>dgcA-r</i>            | atatAAGCTTtcaAGCGCTCCTGCGCTTG                  | <i>dgcA</i> ORF cloning                                                                                                                              |
| <i>yjhH-f</i>            | ATATTCTAGAATGATAAGGCAGGTTATCCAGC               |                                                                                                                                                      |
| <i>yjhH-r</i>            | ATATAAGCTTTTATAGCGCCAGAACCGCCGATT              | <i>yjhH</i> ORF cloning                                                                                                                              |
| 12aa-oligo1              | ATATACTAGTGGCTCGCCGGCCCTCCAGGAGTTCGGT          |                                                                                                                                                      |
| 12aa-oligo2              | ACCTATA                                        | 12 aa linker for CYPet and YPet                                                                                                                      |
| <i>SMc00507-FRET-f</i>   | TATAGGTACCGAACTCCTGGAGGCCCGGCGAGCCACT          |                                                                                                                                                      |
| <i>SMc00507-FRET-r</i>   | AGTATAT                                        |                                                                                                                                                      |
| <i>SMc00507-FRET-f</i>   | ATATACTAGTCAAGTGTCTCAATCAGGTTTCGA              | <i>SMc00507</i> as a linker for CYPet and YPet                                                                                                       |
| <i>SMc00507-FRET-r</i>   | ATATGGTACCGCGAAAGAACTTGTAATAGGACG              |                                                                                                                                                      |
| <i>His6-SMc00507-f</i>   | ATATGGATCCGTTTACAAGGACAGTGTTTCAGCGT            | <i>SMc00507</i> ORF cloning for N-terminal<br>His6-tagging                                                                                           |
| <i>His6-SMc00507-r</i>   | ATATAAGCTTTTACAGCGAAAGAACTTGTAATAGGA           |                                                                                                                                                      |
| <i>His6-SMc00074-f</i>   | ATATGGATCCACCGTCATGCAGCACGCCTTTT               | <i>SMc00074</i> <sup>390-970</sup> ORF cloning for N-<br>terminal His6-tagging                                                                       |
| <i>His6-SMc00074-r</i>   | ATATGTCGACTCAAGCCCGCTTCATCAG                   |                                                                                                                                                      |
| <i>PexoY-f</i>           | gttcaagctTGCCTTGGGTGCTACCTCTTG                 |                                                                                                                                                      |
| <i>PexoY-r</i>           | tgctctagaCTTCATAGAGGTGACTCCAT                  | <i>exoY</i> upstream intergenic region                                                                                                               |
| <i>PSMc00507-f</i>       | ATATAAGCTTCTACTGCATGTTTCCTTTAATCG              |                                                                                                                                                      |
| <i>PSMc00507-TTG-r</i>   | ATATTCTAGACAGCTGCAATCTTCACATGGA                | <i>SMc00507</i> upstream intergenic regions                                                                                                          |
| <i>PSMc00507-ATG-r</i>   | ATATTCTAGAGTAAACCATGGTTTCCTCGAA                |                                                                                                                                                      |

|                       |                                                        |                                                                                    |
|-----------------------|--------------------------------------------------------|------------------------------------------------------------------------------------|
| <i>PSMc01794-f</i>    | ATATCTGCAGCGAACATCCGGTCGGAGC                           | <i>SMc01794</i> upstream intergenic region                                         |
| <i>PSMc01794-r</i>    | ATATTCTAGAGGTCGACATGCGGTTAGG                           |                                                                                    |
| <i>egfp-f</i>         | ggaggagctctaagcttgccttagactgcagATGGTGAGCAAGGG<br>CGAGG | <i>egfp</i> ORF cloning                                                            |
| <i>egfp-r</i>         | gtacggtaccTACTTGTACAGCTCGTCCATG                        |                                                                                    |
| <i>pleD-valid</i>     | AAACTGCTTTCGGCGGCCT                                    | validation of integration site for <i>pleD</i><br>mutation, combined with PCR1     |
| <i>SMa2301-valid</i>  | AGATCAGGTAAAGGCCGAGC                                   | validation of integration site for <i>SMa2301</i><br>mutation, combined with PCR1  |
| <i>SMb20389-valid</i> | CGCATTCTGTAGTTGGTTATGG                                 | validation of integration site for <i>SMb20389</i><br>mutation, combined with PCR1 |
| <i>SMb20523-valid</i> | AGATAATCCGCCGCCGTG                                     | validation of integration site for <i>SMb20523</i><br>mutation, combined with PCR1 |
| <i>SMc01464-valid</i> | AAATCGAACAGGCTCGAAGC                                   | validation of integration site for <i>SMc01464</i><br>mutation, combined with PCR1 |
| <i>SMc04015-valid</i> | TAGTCGATGTCGATGATCGC                                   | validation of integration site for <i>SMc04015</i><br>mutation, combined with PCR1 |
| <i>SMa0137-valid</i>  | ACCAGATCGCTCTCGCCG                                     | validation of integration site for <i>SMa0137</i><br>mutation, combined with PCR1  |
| <i>SMa1548-valid</i>  | AACTTGCGGGTGAAGGTGCA                                   | validation of integration site for <i>SMa1548</i><br>mutation, combined with PCR1  |
| <i>SMb20447-valid</i> | CCCAATGTGTCGTTGATCG                                    | validation of integration site for <i>SMb20447</i><br>mutation, combined with PCR1 |
| <i>SMb20900-valid</i> | GGCGAAGGATCACCATGC                                     | validation of integration site for <i>SMb20900</i><br>mutation, combined with PCR1 |
| <i>SMc00033-valid</i> | CGCAGAGCAGTTTCAAGCC                                    | validation of integration site for <i>SMc00033</i><br>mutation, combined with PCR1 |
| <i>SMc00038-valid</i> | GCTTCGATCAGCAGCACCA                                    | validation of integration site for <i>SMc00038</i><br>mutation, combined with PCR1 |
| <i>SMc00074-valid</i> | AAGGCGTTGACGGTATCCTT                                   | validation of integration site for <i>SMc00074</i><br>mutation, combined with PCR1 |
| <i>SMc00887-valid</i> | CTCAAGCTGCGTCGCGTG                                     | validation of integration site for <i>SMc00887</i><br>mutation, combined with PCR1 |
| <i>SMc00992-valid</i> | TTTCTGACGCAGCATCTGG                                    | validation of integration site for <i>SMc00992</i><br>mutation, combined with PCR1 |
| <i>SMc03141-valid</i> | GAAGCCTGGCGATCTGAGCT                                   | validation of integration site for <i>SMc03141</i><br>mutation, combined with PCR1 |
| <i>SMc03178-valid</i> | TTCCGGACCGGTGGTTAC                                     | validation of integration site for <i>SMc03178</i><br>mutation, combined with PCR1 |
| <i>SMc03942-valid</i> | ATCATCATCGGCAGGCAG                                     | validation of integration site for <i>SMc03942</i><br>mutation, combined with PCR1 |
| <i>SMb21517-valid</i> | GAAACTGTCCAAGGCGATTCT                                  | validation of integration site for <i>SMb21517</i><br>mutation, combined with PCR1 |
| <i>SMc00999-valid</i> | CCCTTCATGTTACCCAGCCT                                   | validation of integration site for <i>SMc00999</i><br>mutation, combined with PCR1 |
| <i>SMc01792-valid</i> | ATCGAATAGGCGATGAATGC                                   | validation of integration site for <i>SMc01792</i><br>mutation, combined with PCR1 |
| PCR1                  | CGGGCCTCTTCGCTATT                                      | Standard sequencing primer 1                                                       |
| PCR2                  | TTAGCTCACTCATTAGG                                      | Standard sequencing primer 2                                                       |
| <i>SMc03942-seq</i>   | TGGCGCTCGACCCGAAAGAA                                   | <i>SMc03942</i> sequencing primer                                                  |
| <i>SMa0137-seq</i>    | GAAACGATAGGATATTTCTCC                                  | <i>SMa0137</i> sequencing primer                                                   |
| <i>SMa1548-seq1</i>   | CGCAAAGCGTGACGCGGATGG                                  | <i>SMa1548</i> sequencing primer 1                                                 |
| <i>SMa1548-seq2</i>   | ACCATCACGAAAGCCGTTCCGAAT                               | <i>SMa1548</i> sequencing primer 2                                                 |
| <i>SMa1548-seq3</i>   | TACAACCTCTGACGGAGTCAC                                  | <i>SMa1548</i> sequencing primer 3                                                 |
| <i>SMb20900-seq</i>   | AAGCGAGGGAGAGCTCCTTC                                   | <i>SMb20900</i> sequencing primer                                                  |
| <i>SMc00033-seq</i>   | TGCGATCTGATGCAGGGCTA                                   | <i>SMc00033</i> sequencing primer                                                  |
| <i>SMc00038-seq</i>   | TGCGCTGCCATCCATGGCCTCG                                 | <i>SMc00038</i> sequencing primer                                                  |
| <i>SMc00992-seq</i>   | CAGATGCTGCGTCAGAAAGTACT                                | <i>SMc00992</i> sequencing primer                                                  |
| <i>SMc03178-seq1</i>  | TCTTCGGCGACCCGGCAATCT                                  | <i>SMc03178</i> sequencing primer 1                                                |
| <i>SMc03178-seq2</i>  | CGCTTCCTGGACCAGATTCT                                   | <i>SMc03178</i> sequencing primer 2                                                |
| <i>SMc00074-seq1</i>  | ACGCCTACAAGGATACCGTCA                                  | <i>SMc00074</i> sequencing primer 1                                                |
| <i>SMc00074-seq2</i>  | ATCGTGCTCCTGATCGGC                                     | <i>SMc00074</i> sequencing primer 2                                                |
| <i>SMc00074-seq3</i>  | ACAATGTCCTCATCGCGCT                                    | <i>SMc00074</i> sequencing primer 3                                                |

## REFERENCES

1. **Bahlawane C, McIntosh M, Krol E, Becker A.** 2008. *Sinorhizobium meliloti* regulator MucR couples exopolysaccharide synthesis and motility. *Mol Plant Microbe Interact* **21**:1498-1509.
2. **Becker A, Barnett MJ, Capela D, Dondrup M, Kamp PB, Krol E, Linke B, Rüberg S, Runte K, Schroeder BK, Weidner S, Yurgel SN, Batut J, Long SR, Pühler A, Goesmann A.** 2009. A portal for rhizobial genomes: RhizoGATE integrates a *Sinorhizobium meliloti* genome annotation update with postgenome data. *J Biotechnol* **140**:45-50.
3. **Becker A, Rüberg S, Küster H, Roxlau AA, Keller M, Ivashina T, Cheng HP, Walker GC, Pühler A.** 1997. The 32-kilobase exp gene cluster of *Rhizobium meliloti* directing the biosynthesis of galactoglucan: genetic organization and properties of the encoded gene products. *J Bacteriol* **179**:1375-1384.
4. **Boehm A, Steiner S, Zaehring F, Casanova A, Hamburger F, Ritz D, Keck W, Ackermann M, Schirmer T, Jenal U.** 2009. Second messenger signalling governs *Escherichia coli* biofilm induction upon ribosomal stress. *Mol Microbiol* **72**:1500-1516.
5. **Casse F, Boucher C, Julliot J, Michel M, Dénarié J.** 1979. Identification and characterization of large plasmids in *Rhizobium meliloti* using agarose gel electrophoresis. *Microbiology* **113**:229-242.
6. **Charoenpanich P, Meyer S, Becker A, McIntosh M.** 2013. Temporal expression program of quorum sensing-based transcription regulation in *Sinorhizobium meliloti*. *J Bacteriol* **195**:3224-3236.
7. **Charoenpanich P, Soto MJ, Becker A, McIntosh M.** 2015. Quorum sensing restrains growth and is rapidly inactivated during domestication of *Sinorhizobium meliloti*. *Environ Microbiol Rep* **7**:373-382.
8. **Christen M, Kulasekara HD, Christen B, Kulasekara BR, Hoffman LR, Miller SI.** 2010. Asymmetrical distribution of the second messenger c-di-GMP upon bacterial cell division. *Science* **328**:1295-1297.
9. **Fürste JP, Pansegrau W, Frank R, Blöcker H, Scholz P, Bagdasarian M, Lanka E.** 1986. Molecular cloning of the plasmid RP4 primase region in a multi-host-range *tacP* expression vector. *Gene* **48**:119-131.
10. **Grant SG, Jessee J, Bloom FR, Hanahan D.** 1990. Differential plasmid rescue from transgenic mouse DNAs into *Escherichia coli* methylation-restriction mutants. *Proc Natl Acad Sci U S A* **87**:4645-4649.
11. **Khan SR, Gaines J, Roop RM, Farrand SK.** 2008. Broad-host-range expression vectors with tightly regulated promoters and their use to examine the influence of TraR and TraM expression on Ti plasmid quorum sensing. *Appl Environ Microbiol* **74**:5053-5062.
12. **Luo L, Yao SY, Becker A, Rüberg S, Yu GQ, Zhu JB, Cheng HP.** 2005. Two new *Sinorhizobium meliloti* LysR-type transcriptional regulators required for nodulation. *J Bacteriol* **187**:4562-4572.
13. **McIntosh M, Krol E, Becker A.** 2008. Competitive and cooperative effects in quorum-sensing-regulated galactoglucan biosynthesis in *Sinorhizobium meliloti*. *J Bacteriol* **190**:5308-5317.
14. **McIntosh M, Meyer S, Becker A.** 2009. Novel *Sinorhizobium meliloti* quorum sensing positive and negative regulatory feedback mechanisms respond to phosphate availability. *Mol Microbiol* **74**:1238-1256.

15. **Pobigaylo N, Wetter D, Szymczak S, Schiller U, Kurtz S, Meyer F, Nattkemper TW, Becker A.** 2006. Construction of a large sequence signature-tagged miniTn5 transposon library and its application to mutagenesis of *Sinorhizobium meliloti*. *Appl Environ Microbiol* **72**:4329-4337.
16. **Schäfer A, Tauch A, Jäger W, Kalinowski J, Thierbach G, Pühler A.** 1994. Small mobilizable multi-purpose cloning vectors derived from the *Escherichia coli* plasmids pK18 and pK19: selection of defined deletions in the chromosome of *Corynebacterium glutamicum*. *Gene* **145**:69-73.
17. **Schirmer F, Ehrh S, Hillen W.** 1997. Expression, inducer spectrum, domain structure, and function of MopR, the regulator of phenol degradation in *Acinetobacter calcoaceticus* NCIB8250. *J Bacteriol* **179**:1329-1336.
18. **Selbitschka W, Dresing U, Hagen M, Niemann S, Pühler A.** 1995. A biological containment system for *Rhizobium meliloti* based on the use of recombination-deficient (*recA*<sup>-</sup>) strains. *FEMS Microbiology Ecology* **16**:223-232.
19. **Shaw PD, Ping G, Daly SL, Cha C, Cronan JE, Rinehart KL, Farrand SK.** 1997. Detecting and characterizing N-acyl-homoserine lactone signal molecules by thin-layer chromatography. *Proc Natl Acad Sci U S A* **94**:6036-6041.
20. **Simon R, Priefer U, Pühler A.** 1983. A broad host range mobilization system for *in vivo* genetic engineering: transposon mutagenesis in gram-negative bacteria. *Nature Biotechnology* **1**:784-791.
21. **Skotnicka D, Petters T, Heering J, Hoppert M, Kaever V, Søgaard-Andersen L.** 2015. c-di-GMP regulates type IV pili-dependent-motility in *Myxococcus xanthus*. *J Bacteriol* doi: 10.1128/JB.00281-15.

## Supplemental figures

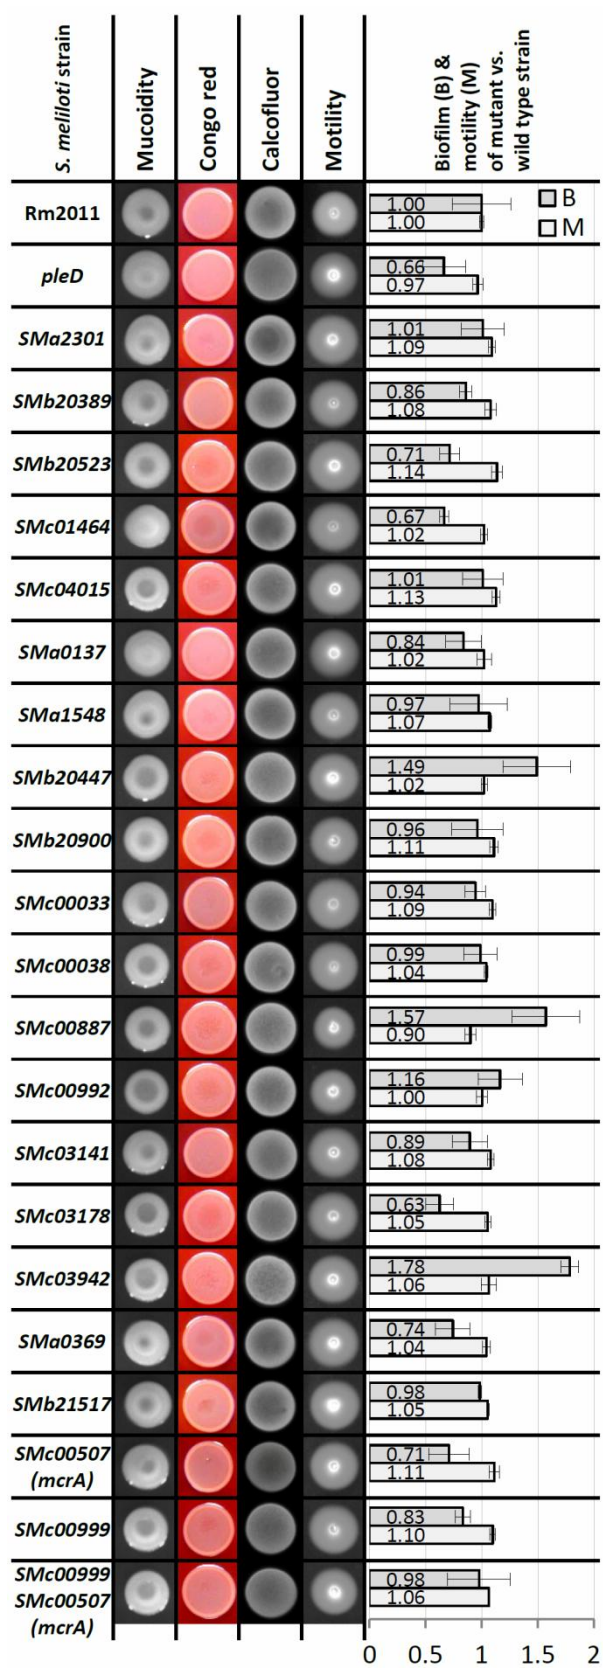

**FIG S1** Phenotypic analysis of gene knock-outs in Rm2011. Error bars indicate standard deviations of three biological replicates. The  $A_{570}/OD_{600}$  mean value for Rm2011 was  $0.131 \pm 0.034$  (set to 1).

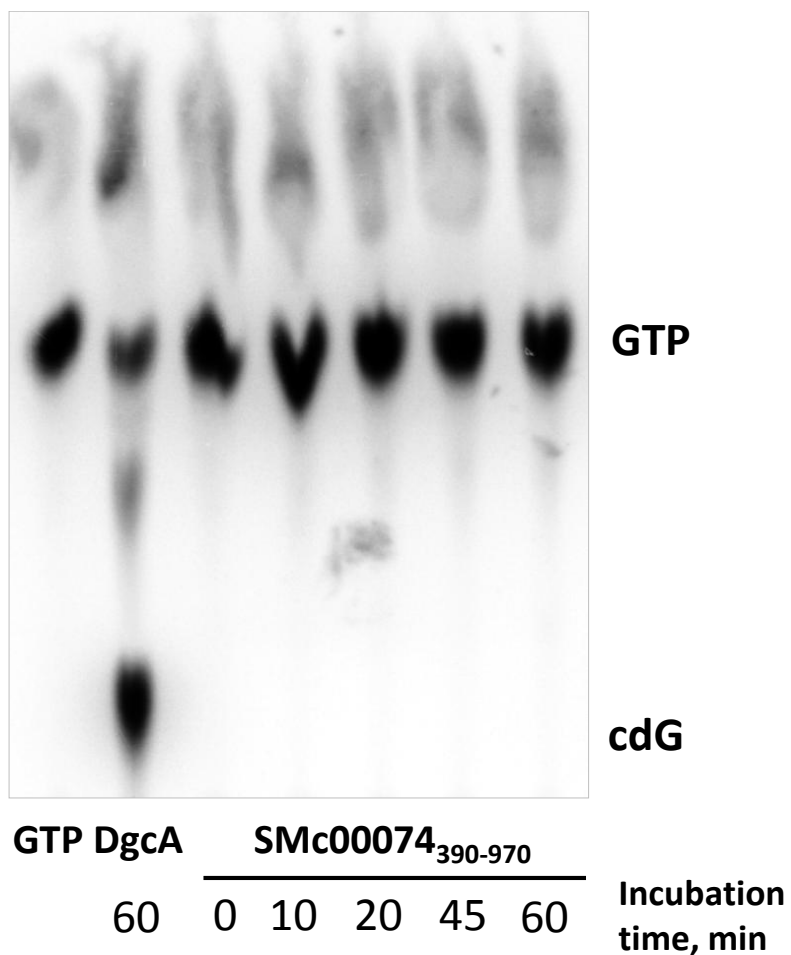

**FIG S2** Assay for DGC activity of the C-terminal portion of SMc00074 containing the predicted DGC and PDE domains. Thin-layer chromatography of reaction mixtures containing radiolabelled GTP and purified protein. Absence of a cdG signal and unchanged intensity of the GTP band indicate that SMc00074<sub>390-970</sub> does not have DGC activity.

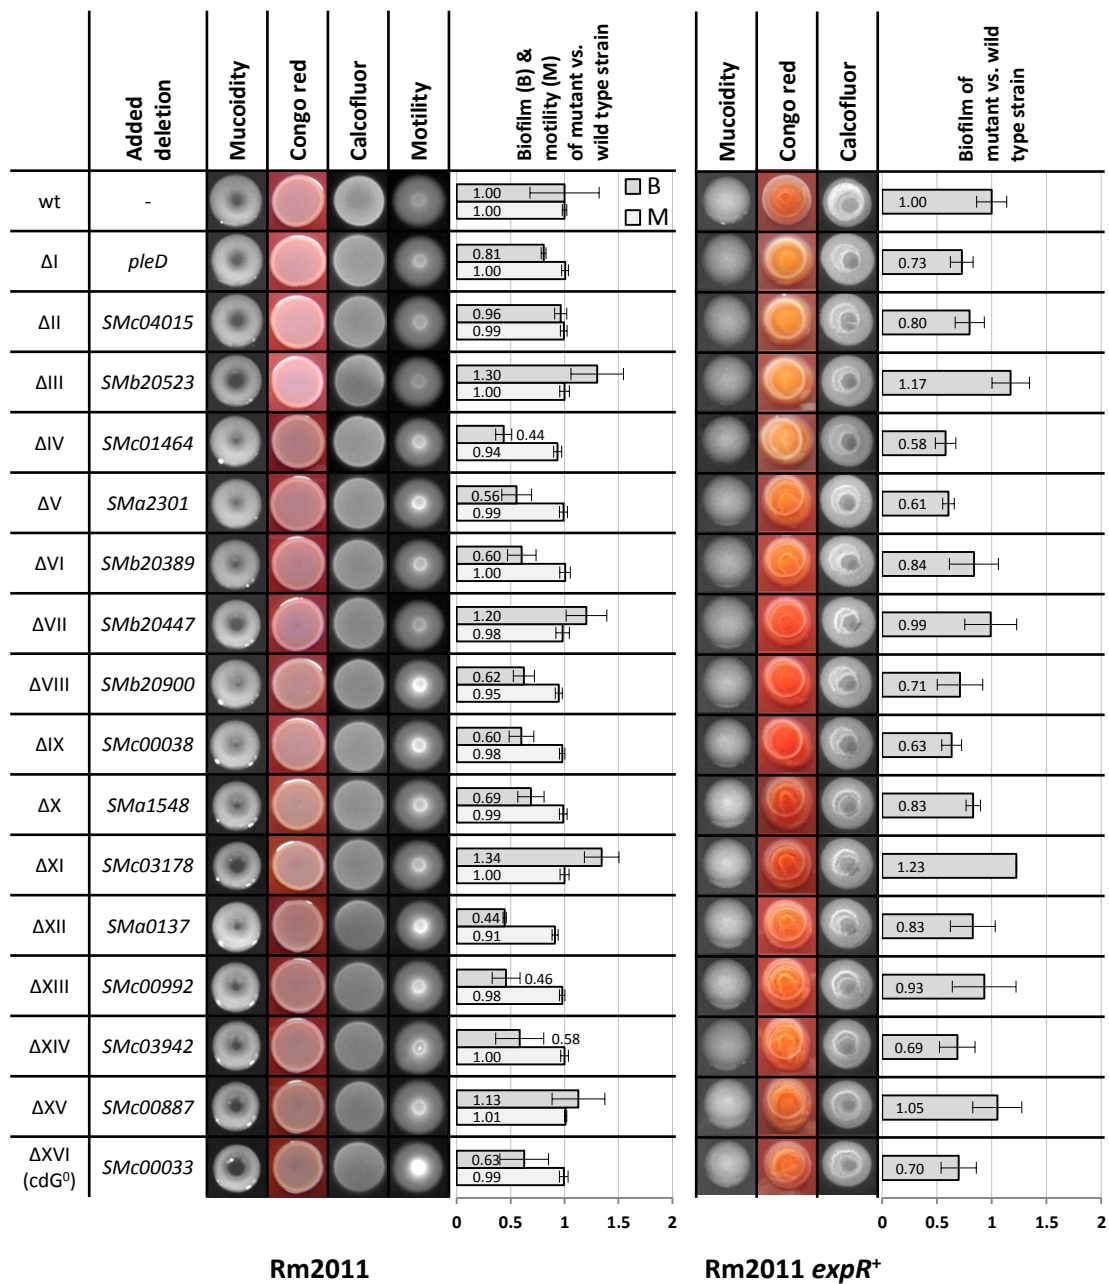

**FIG S3** Phenotypic analysis of Rm2011 and Rm2011 *expR*<sup>+</sup> carrying multiple markerless deletions of DGC/PDE genes. Error bars indicate standard deviations of three biological replicates. The  $A_{570}/OD_{600}$  mean values for Rm2011 and Rm2011 *expR*<sup>+</sup> were  $0.110 \pm 0.035$  and  $0.343 \pm 0.047$ , respectively (set to 1).

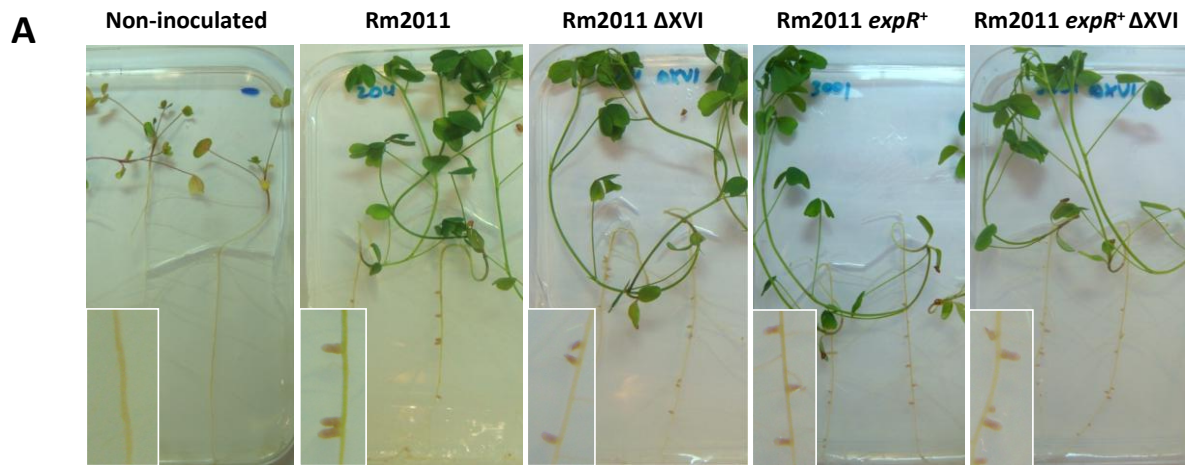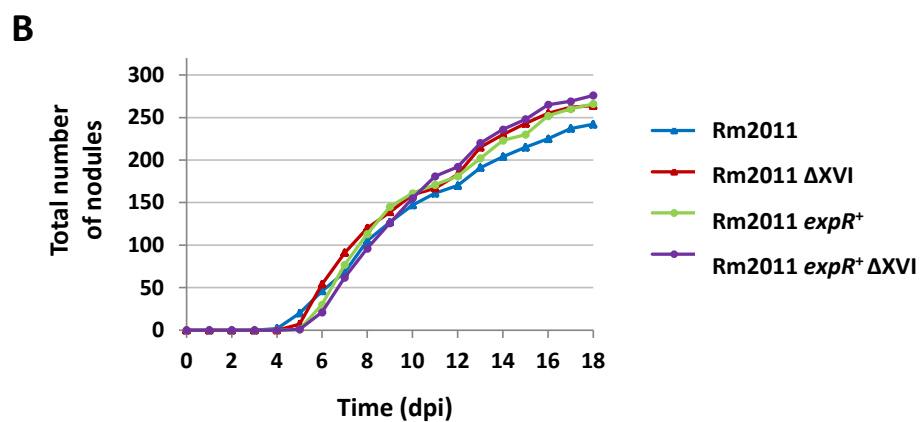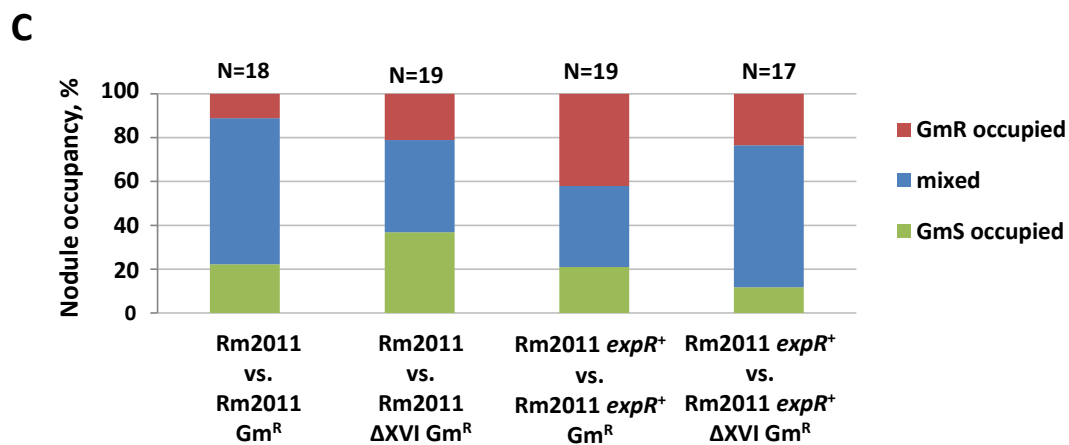

**FIG S4** Symbiotic phenotype of  $cdG^0$  strains. (A) Macroscopic appearance of *M. sativa* plants with root nodules formed by  $cdG^0$  strains or corresponding parental strains 24 days post inoculation. Pink nitrogen-fixing nodules indicate efficient symbiosis. (B) Nodulation kinetics, determined for 32 plants per strain. (C) Competitive nodulation assay. Before inoculation, strains were mixed 1:1. N, number of analyzed nodules.



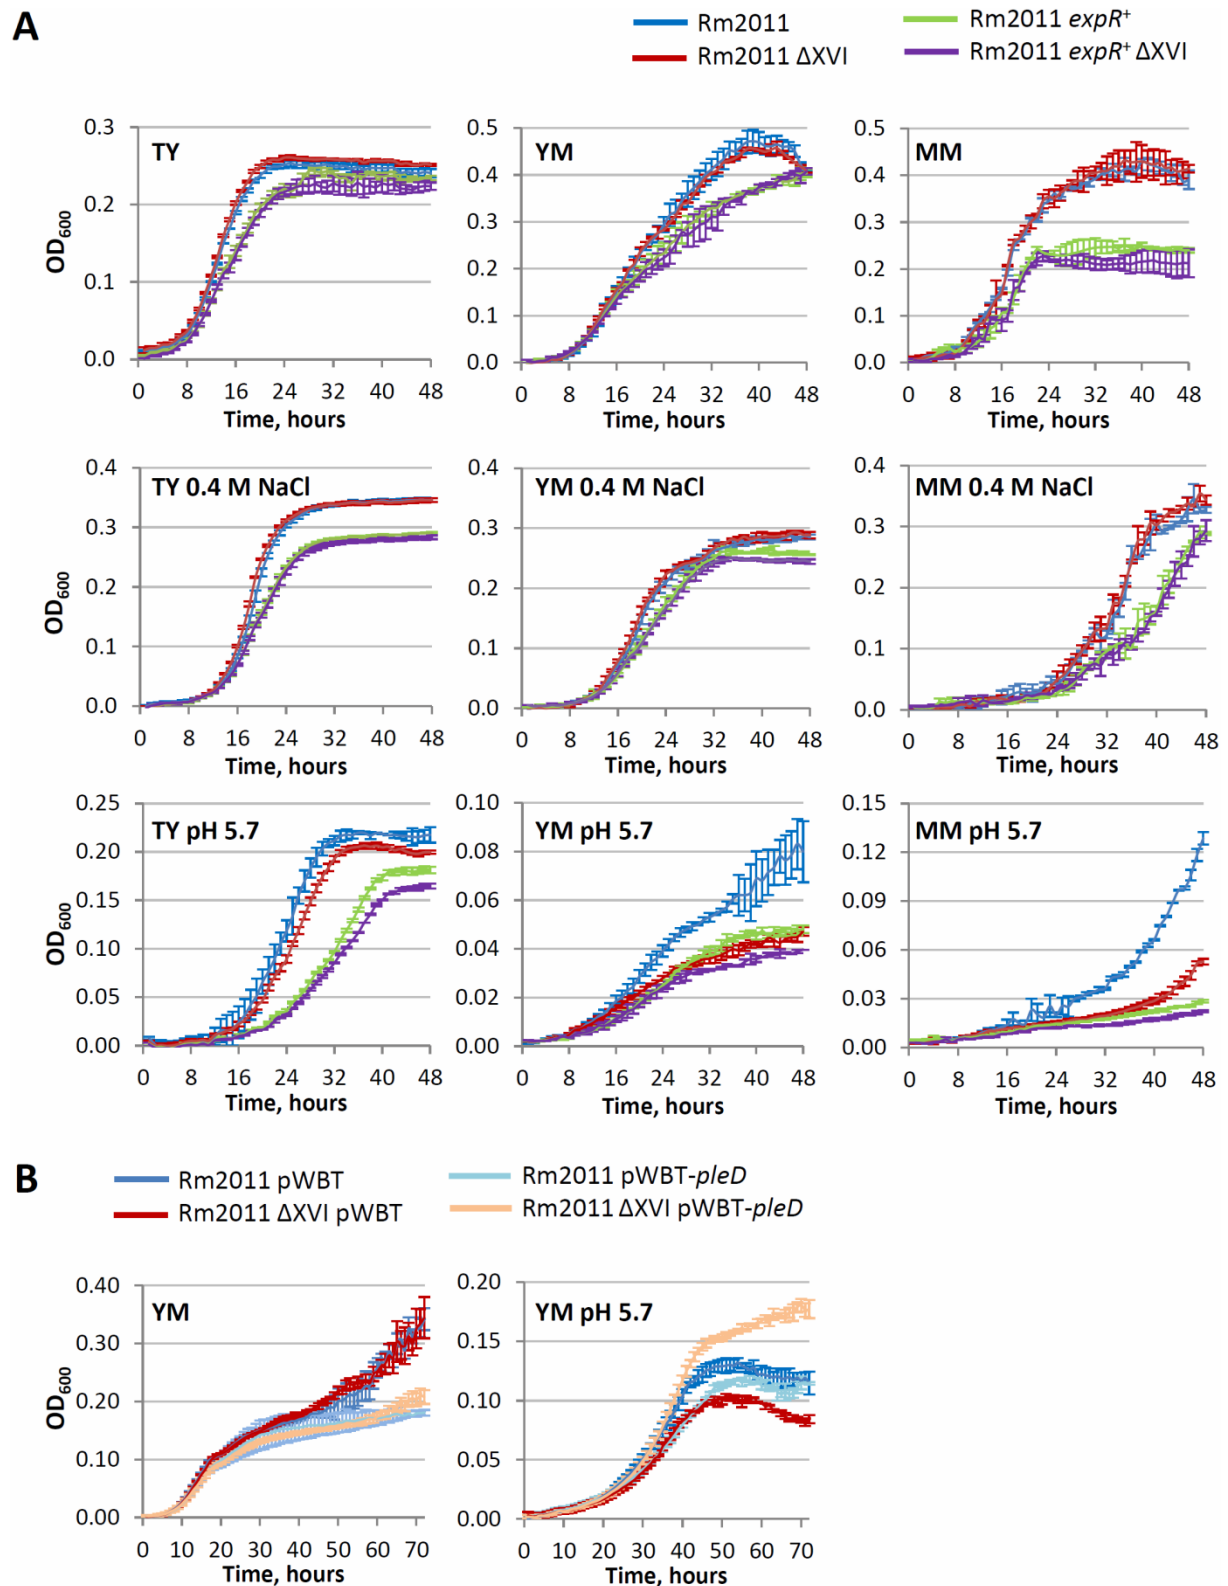

**FIG S5** Growth of  $cdG^0$  strains in different media. (A) Growth under normal, high-salt and acidic conditions. (B) Complementation of the growth defect of the Rm2011  $cdG^0$  strain at pH 5.7 by pWBT-*pleD* in presence of 100  $\mu$ M IPTG. Error bars indicate standard deviations of three biological replicates.

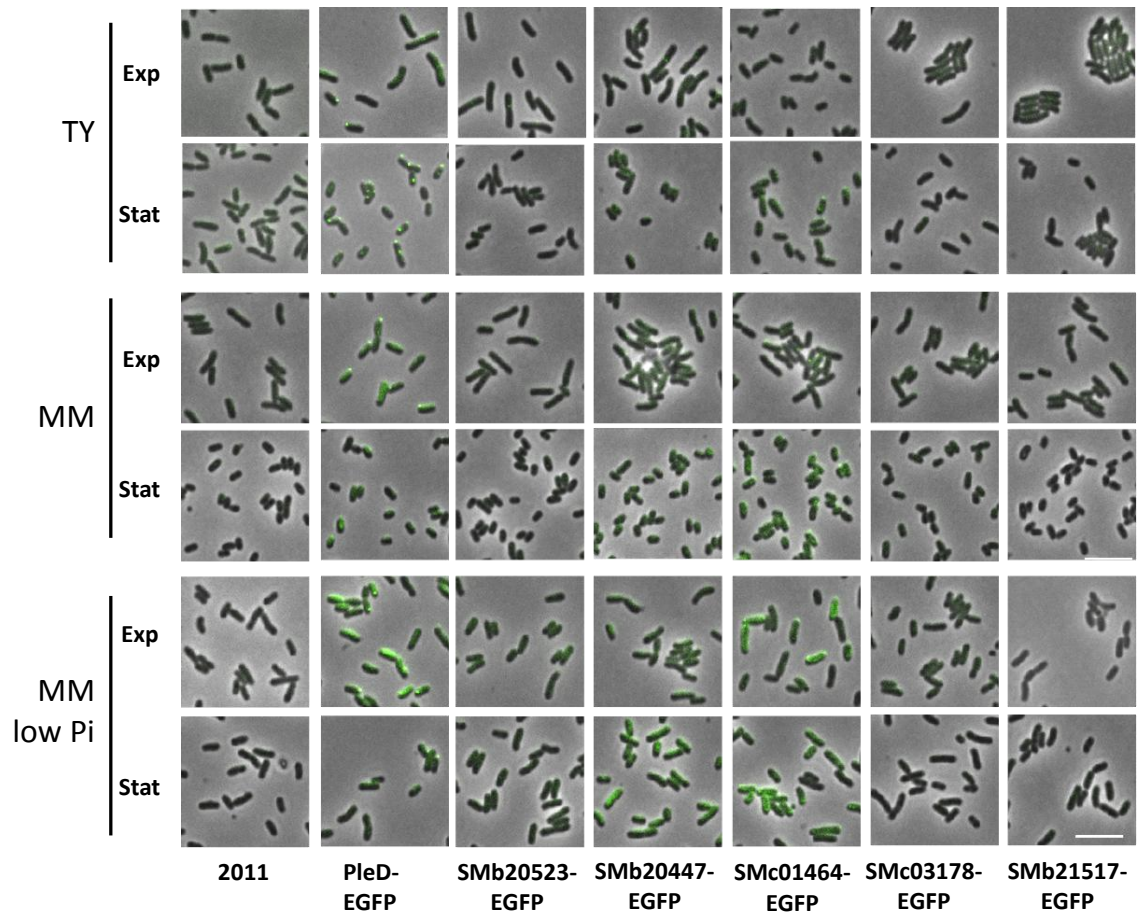

**FIG S6** Detection of EGFP-tagged putative DGC/PDEs in Rm2011 cells grown on TY, MM or phosphate-limiting MM. Exp, exponential growth phase ( $OD_{600}$  of 0.6 to 0.8); Stat, stationary growth phase (after 40 h of growth). Scale bar, 5  $\mu$ m. All images were taken using identical settings.

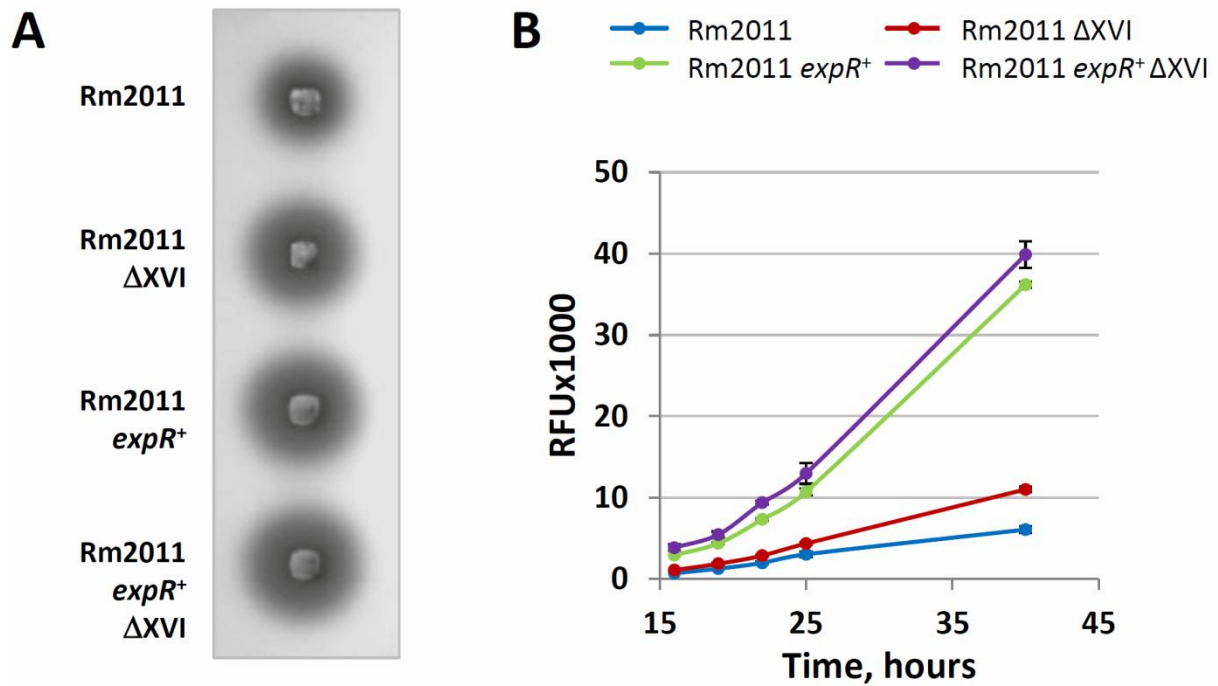

**FIG S7** cdG negatively affects AHL production at the level of *sinI* transcription. (A) Semiquantitative detection of AHLs in supernatants of *S. meliloti* stationary phase cultures by *A. tumefaciens* NTL4 (pZLR4). (B) *sinI* promoter activity determined using a  $P_{sinI}$ -*egfp* fusion. RFU, relative EGFP fluorescence units. Error bars indicate standard deviations of three biological replicates.

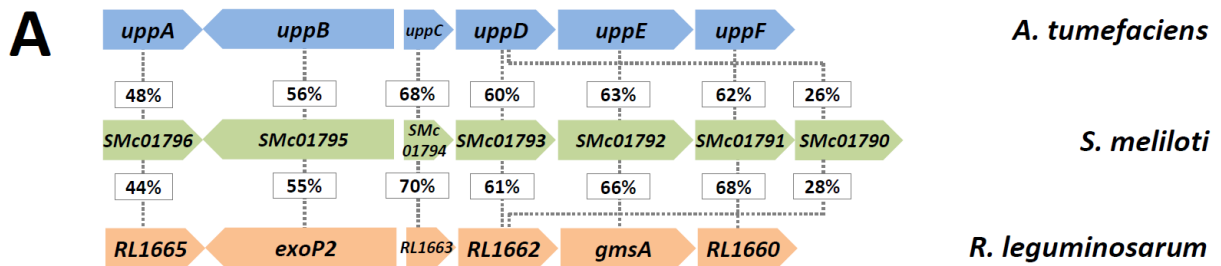

*SMc01790*: Putative glycosyltransferase  
*SMc01791*: Conserved hypothetical transmembrane protein  
*SMc01792*: Putative surface polysaccharide biosynthesis glycosyltransferase  
*SMc01793*: Putative glycosyltransferase  
*SMc01794*: Putative polysaccharide export system periplasmic transmembrane protein  
*SMc01795*: Surface polysaccharide transport protein  
*SMc01796*: Conserved hypothetical protein

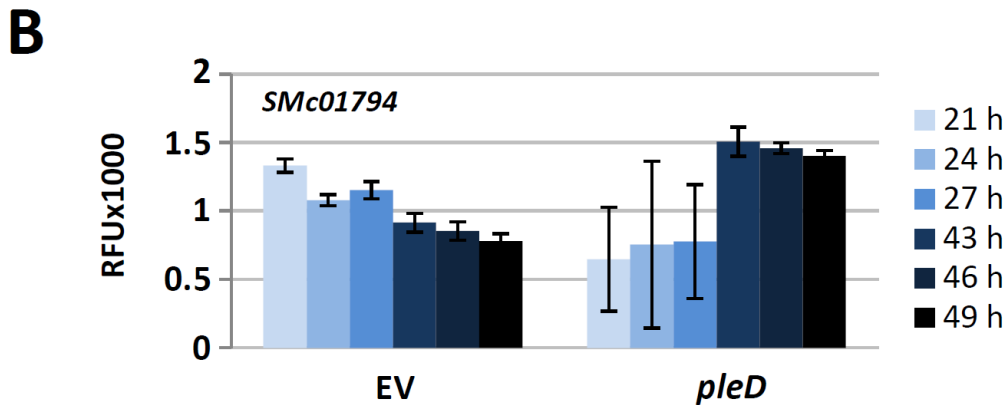

**FIG S8** *S. meliloti* *SMc01790-SMc01796* gene cluster: architecture and expression upon overproduction of PleD. (A) Homology of the *SMc01790-SMc01796* gene cluster to the *A. tumefaciens upp* and *R. leguminosarum RL1660-RL1665* gene clusters. Percent numbers indicate amino acid sequence identities. (B) *SMc01794* promoter activity during growth in 30 % MM with or without *pleD* overexpression determined using a promoter-*egfp* fusion. EV, empty vector. RFU, relative EGFP fluorescence units. Error bars indicate standard deviations of three biological replicates.

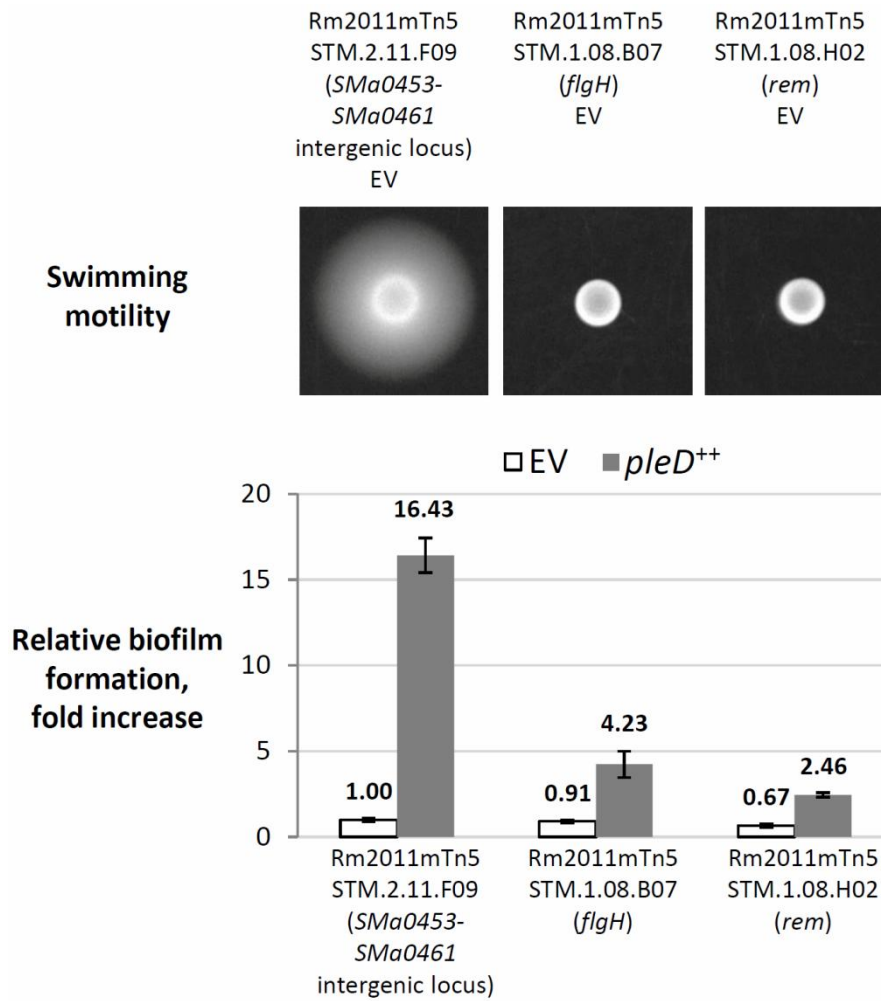

**FIG S9** Biofilm formation of motility-deficient strains upon *pleD* overexpression. EV, empty pWBT vector. The  $A_{570}/OD_{600}$  mean value for Rm2011mTn5STM.2.11.F09 pWBT was  $0.338 \pm 0.038$  (set to 1). This control strain carrying an intergenic mTn5STM insertion is not affected in any phenotype analyzed in this study. Error bars represent standard deviations of three biological replicates.

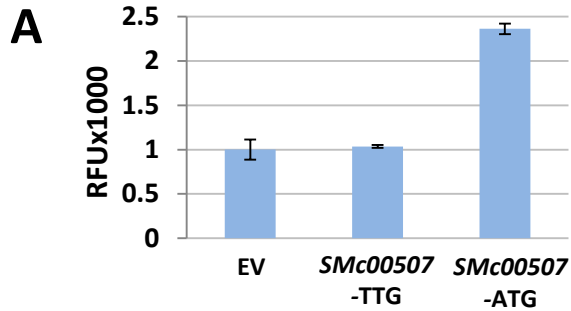

***S. meliloti* chromosome 1905425-1905482**

TGTGAAGA **TTG**CAGCTGTCTCAATCAGGTTTCGAGGAAACC **ATG**GTTTACAAGGACAG

**Annotated  
start**

**Experimentally  
verified start**

**B**

10 20 30 40 50  
 M V Y K D S V Q **R**A S S **R**E E T K I T G T V T C K T G S T N G I V V **D**L **S**D E **G** I C F R L L F D I G

60 70 80 90 100  
 A R T G Q E V T I R S E E L G F L S G M V R W A R G D R I G I K L N L S S N T A A Q I S S Y Y K F F

101  
 R

**FIG S10** Experimental validation of the SMc00507 (*mcrA*) start codon. (A) *mcrA* promoter activity determined using promoter fusions to *egfp*, which were generated either using the annotated start codon TTG or the alternative start codon ATG. EV, empty vector. RFU, relative EGFP fluorescence units. Error bars indicate standard deviations of three biological replicates. (B) SMc00507 amino acid sequence with the ATG as translation start. RxxxR and DxSxxG motifs are indicated.

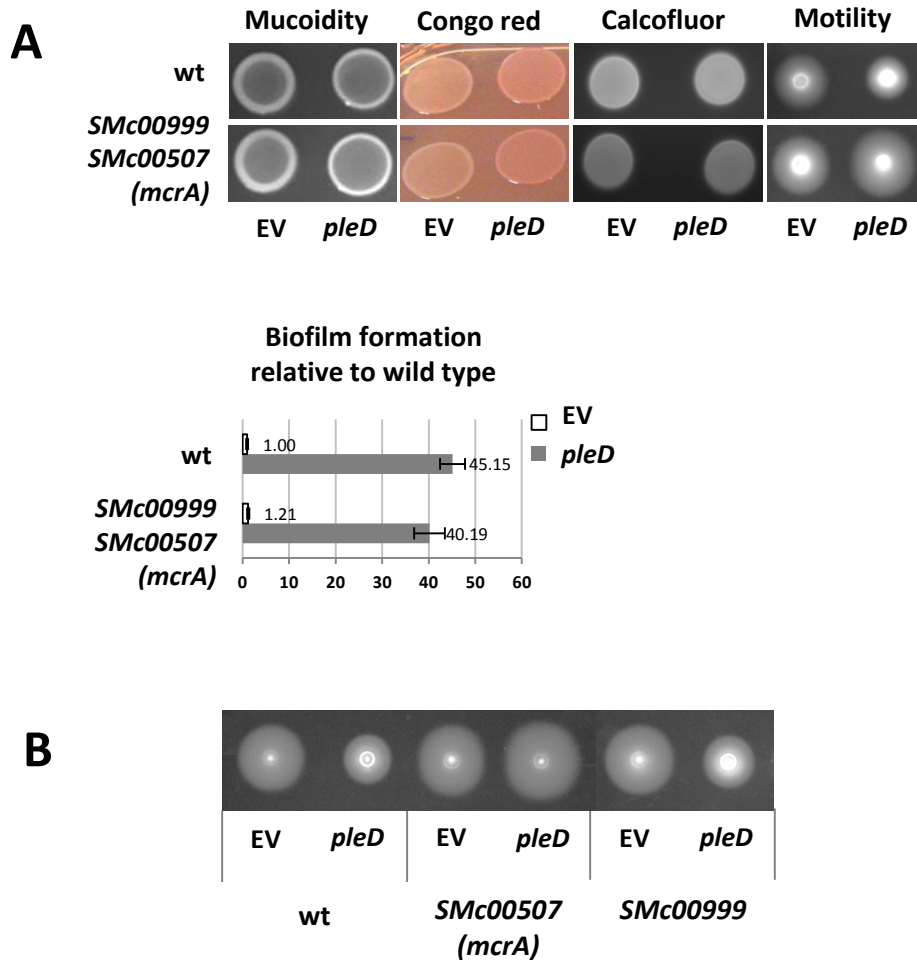

**FIG S11** Identification of McrA (*SMc00507*) as a PilZ domain cdG receptor mediating repression of swimming motility upon *pleD* overexpression. (A) Phenotypic analysis of a double mutant in the PilZ domain protein-encoding genes *SMc00507* and *SMc00999* with or without *pleD* overexpression. Error bars indicate standard deviations of three biological replicates. The  $A_{570}/OD_{600}$  mean value for Rm2011 pWBT was  $0.087 \pm 0.020$  (set to 1). (B) Effect of *pleD* overexpression on motility of single mutants in *SMc00507* and *SMc00999*. EV, empty pWBT vector.
